# Supplementary material
Source: publisher figshare collection journal article supplement (https://acs.figshare.com/ndownloader/files/5716128)
Supplement: Supplementary file 1 [file 5716128]

# ic991426l.cif

data_cisW6S8((C6H11)3P)4(C9H13N)2
  
_audit_creation_method            SHELXL 
_chemical_name_systematic 
; 
octakis(\m~3~-sulfido)-cis-bis(4-tert-butylpyridine)-
tetrakis(tricyclohexylphosphine)-hexa-tungsten 
bis(heptane) solvate 
; 
_chemical_name_common             'tungsten sulfide cluster'
_chemical_formula_moiety          'W6 S8 ((C6H11)3P)4 (C9H13N)2'
_chemical_formula_structural      ? 
_chemical_formula_analytical      ? 
_chemical_formula_sum             'C104 H190 N2 P4 S8 W6' 
_chemical_formula_weight          2952.04 
_chemical_melting_point           'not measured'
_chemical_compound_source         ? 
  
loop_ 
 _atom_type_symbol 
 _atom_type_description 
 _atom_type_scat_dispersion_real 
 _atom_type_scat_dispersion_imag 
 _atom_type_scat_source 
 'C'  'C'   0.0033   0.0016 
 'International Tables Vol C Tables 4.2.6.8 and 6.1.1.4' 
 'H'  'H'   0.0000   0.0000 
 'International Tables Vol C Tables 4.2.6.8 and 6.1.1.4' 
 'N'  'N'   0.0061   0.0033 
 'International Tables Vol C Tables 4.2.6.8 and 6.1.1.4' 
 'P'  'P'   0.1023   0.0942 
 'International Tables Vol C Tables 4.2.6.8 and 6.1.1.4' 
 'S'  'S'   0.1246   0.1234 
 'International Tables Vol C Tables 4.2.6.8 and 6.1.1.4' 
 'W'  'W'  -0.8490   6.8722 
 'International Tables Vol C Tables 4.2.6.8 and 6.1.1.4' 
  
_symmetry_cell_setting            Monoclinic 
_symmetry_space_group_name_H-M    C2/c 
  
loop_ 
 _symmetry_equiv_pos_as_xyz 
 'x, y, z' 
 '-x, y, -z+1/2' 
 'x+1/2, y+1/2, z' 
 '-x+1/2, y+1/2, -z+1/2' 
 '-x, -y, -z' 
 'x, -y, z-1/2' 
 '-x+1/2, -y+1/2, -z' 
 'x+1/2, -y+1/2, z-1/2' 
  
_cell_length_a                    31.2094(2) 
_cell_length_b                    13.1764(2) 
_cell_length_c                    29.4518(5) 
_cell_angle_alpha                 90.00 
_cell_angle_beta                  111.3210(10) 
_cell_angle_gamma                 90.00 
_cell_volume                      11282.5(3) 
_cell_formula_units_Z             4 
_cell_measurement_temperature     173(2) 
_cell_measurement_reflns_used     ? 
_cell_measurement_theta_min       ? 
_cell_measurement_theta_max       ? 
  
_exptl_crystal_description        block 
_exptl_crystal_colour             red 
_exptl_crystal_size_max           0.25 
_exptl_crystal_size_mid           0.15 
_exptl_crystal_size_min           0.1 
_exptl_crystal_density_meas       'not measured'
_exptl_crystal_density_diffrn     1.738 
_exptl_crystal_density_method     'not measured'
_exptl_crystal_F_000              5840 
_exptl_absorpt_coefficient_mu     6.341 
_exptl_absorpt_correction_type    psi-scan
_exptl_absorpt_correction_T_min   0.5766 
_exptl_absorpt_correction_T_max   0.9211 
_exptl_absorpt_process_details    'SADABS'  
_exptl_special_details 
; 
 ? 
; 
  
_diffrn_ambient_temperature       173(2) 
_diffrn_radiation_wavelength      0.71073 
_diffrn_radiation_type            MoK\a 
_diffrn_radiation_source          'fine-focus sealed tube' 
_diffrn_radiation_monochromator   graphite 
_diffrn_measurement_device        'Siemens SMART CCD Diffractometer' 
_diffrn_measurement_method        '\w scans'
_diffrn_standards_number          ? 
_diffrn_standards_interval_count  ? 
_diffrn_standards_interval_time   ? 
_diffrn_standards_decay_%         0
_diffrn_reflns_number             32739 
_diffrn_reflns_av_R_equivalents   0.0415 
_diffrn_reflns_av_sigmaI/netI     0.0538 
_diffrn_reflns_limit_h_min        -39 
_diffrn_reflns_limit_h_max        41 
_diffrn_reflns_limit_k_min        -17 
_diffrn_reflns_limit_k_max        17 
_diffrn_reflns_limit_l_min        -32 
_diffrn_reflns_limit_l_max        37 
_diffrn_reflns_theta_min          1.40 
_diffrn_reflns_theta_max          28.48 
_reflns_number_total              12621 
_reflns_number_observed           9584 
_reflns_observed_criterion        >2sigma(I) 
  
_computing_data_collection        'BRUKER SMART'
_computing_cell_refinement        'BRUKER SAINT'
_computing_data_reduction          SHELXTL
_computing_structure_solution     'SHELXS-86 (Sheldrick, 1990)' 
_computing_structure_refinement   'SHELXL-93 (Sheldrick, 1993)' 
_computing_molecular_graphics     'Siemens SHELXTL' 
_computing_publication_material   'Siemens SHELXTL' 
  
_refine_special_details 
; 
 Refinement on F^2^ for ALL reflections except for 10 with very negative F^2^ 
 or flagged by the user for potential systematic errors.  Weighted R-factors 
 wR and all goodnesses of fit S are based on F^2^, conventional R-factors R 
 are based on F, with F set to zero for negative F^2^. The observed criterion 
 of F^2^ > 2sigma(F^2^) is used only for calculating _R_factor_obs etc. and is 
 not relevant to the choice of reflections for refinement.  R-factors based 
 on F^2^ are statistically about twice as large as those based on F, and R- 
 factors based on ALL data will be even larger. 
; 
  
_refine_ls_structure_factor_coef  Fsqd 
_refine_ls_matrix_type            full 
_refine_ls_weighting_scheme 
 'calc w=1/[\s^2^(Fo^2^)+(0.0000P)^2^+0.0000P] where P=(Fo^2^+2Fc^2^)/3' 
_atom_sites_solution_primary      direct 
_atom_sites_solution_secondary    difmap 
_atom_sites_solution_hydrogens    geom 
_refine_ls_hydrogen_treatment     ? 
_refine_ls_extinction_method      none 
_refine_ls_extinction_coef        ? 
_refine_ls_number_reflns          12611 
_refine_ls_number_parameters      533 
_refine_ls_number_restraints      0 
_refine_ls_R_factor_all           0.0593 
_refine_ls_R_factor_obs           0.0365 
_refine_ls_wR_factor_all          0.0704 
_refine_ls_wR_factor_obs          0.0632 
_refine_ls_goodness_of_fit_all    1.146 
_refine_ls_goodness_of_fit_obs    1.204 
_refine_ls_restrained_S_all       1.162 
_refine_ls_restrained_S_obs       1.204 
_refine_ls_shift/esd_max          0.607 
_refine_ls_shift/esd_mean         0.014 
  
loop_ 
 _atom_site_label 
 _atom_site_type_symbol 
 _atom_site_fract_x 
 _atom_site_fract_y 
 _atom_site_fract_z 
 _atom_site_U_iso_or_equiv 
 _atom_site_thermal_displace_type 
 _atom_site_occupancy 
 _atom_site_calc_flag 
 _atom_site_refinement_flags 
 _atom_site_disorder_group 
W1 W 0.978043(6) 0.05042(2) 0.201290(6) 0.01035(5) Uani 1 d . . 
W2 W 0.942013(6) -0.05282(2) 0.257661(6) 0.01037(5) Uani 1 d . . 
W3 W 0.979142(6) -0.152211(15) 0.201681(7) 0.01134(5) Uani 1 d . . 
S1 S 0.90814(4) -0.05374(10) 0.16842(4) 0.0145(2) Uani 1 d . . 
S2 S 0.94789(4) 0.13327(9) 0.25767(4) 0.0142(3) Uani 1 d . . 
S3 S 0.94740(4) -0.24047(10) 0.25589(4) 0.0158(3) Uani 1 d . . 
S4 S 1.01401(4) -0.05031(10) 0.15473(4) 0.0148(2) Uani 1 d . . 
P1 P 0.94151(4) 0.17524(9) 0.12933(4) 0.0140(3) Uani 1 d . . 
P2 P 0.86280(4) -0.06613(10) 0.26795(4) 0.0148(3) Uani 1 d . . 
N1 N 0.95234(14) -0.2627(3) 0.13902(13) 0.0173(9) Uani 1 d . . 
C101 C 0.9642(2) 0.3073(4) 0.1353(2) 0.0191(11) Uani 1 d . . 
H10A H 0.9459(2) 0.3443(4) 0.1047(2) 0.023 Uiso 1 calc R . 
C102 C 0.9574(2) 0.3629(4) 0.1777(2) 0.0243(12) Uani 1 d . . 
H10B H 0.9746(2) 0.3276(4) 0.2086(2) 0.029 Uiso 1 calc R . 
H10C H 0.9244(2) 0.3625(4) 0.1732(2) 0.029 Uiso 1 calc R . 
C103 C 0.9744(2) 0.4728(4) 0.1802(2) 0.0347(15) Uani 1 d . . 
H10D H 0.9549(2) 0.5096(4) 0.1506(2) 0.042 Uiso 1 calc R . 
H10E H 0.9712(2) 0.5069(4) 0.2088(2) 0.042 Uiso 1 calc R . 
C104 C 1.0239(2) 0.4777(4) 0.1842(2) 0.039(2) Uani 1 d . . 
H10F H 1.0438(2) 0.4473(4) 0.2155(2) 0.047 Uiso 1 calc R . 
H10G H 1.0331(2) 0.5495(4) 0.1839(2) 0.047 Uiso 1 calc R . 
C105 C 1.0309(2) 0.4215(4) 0.1424(2) 0.0337(15) Uani 1 d . . 
H10H H 1.0639(2) 0.4226(4) 0.1468(2) 0.040 Uiso 1 calc R . 
H10I H 1.0135(2) 0.4561(4) 0.1113(2) 0.040 Uiso 1 calc R . 
C106 C 1.0146(2) 0.3119(4) 0.1401(2) 0.0240(12) Uani 1 d . . 
H10J H 1.0338(2) 0.2757(4) 0.1701(2) 0.029 Uiso 1 calc R . 
H10K H 1.0183(2) 0.2774(4) 0.1119(2) 0.029 Uiso 1 calc R . 
C107 C 0.9499(2) 0.1266(4) 0.0733(2) 0.0166(11) Uani 1 d . . 
H10L H 0.9829(2) 0.1052(4) 0.0845(2) 0.020 Uiso 1 calc R . 
C108 C 0.9222(2) 0.0298(4) 0.0539(2) 0.0228(12) Uani 1 d . . 
H10M H 0.9261(2) -0.0173(4) 0.0813(2) 0.027 Uiso 1 calc R . 
H10N H 0.8892(2) 0.0470(4) 0.0387(2) 0.027 Uiso 1 calc R . 
C109 C 0.9378(2) -0.0220(4) 0.0165(2) 0.0300(14) Uani 1 d . . 
H10O H 0.9183(2) -0.0822(4) 0.0033(2) 0.036 Uiso 1 calc R . 
H10P H 0.9699(2) -0.0454(4) 0.0325(2) 0.036 Uiso 1 calc R . 
C110 C 0.9347(2) 0.0500(5) -0.0252(2) 0.040(2) Uani 1 d . . 
H11A H 0.9481(2) 0.0166(5) -0.0472(2) 0.048 Uiso 1 calc R . 
H11B H 0.9020(2) 0.0649(5) -0.0444(2) 0.048 Uiso 1 calc R . 
C111 C 0.9601(2) 0.1487(5) -0.0063(2) 0.037(2) Uani 1 d . . 
H11C H 0.9934(2) 0.1346(5) 0.0092(2) 0.045 Uiso 1 calc R . 
H11D H 0.9556(2) 0.1953(5) -0.0340(2) 0.045 Uiso 1 calc R . 
C112 C 0.9433(2) 0.2000(4) 0.0306(2) 0.0284(14) Uani 1 d . . 
H11E H 0.9104(2) 0.2180(4) 0.0149(2) 0.034 Uiso 1 calc R . 
H11F H 0.9610(2) 0.2631(4) 0.0427(2) 0.034 Uiso 1 calc R . 
C113 C 0.8778(2) 0.1895(4) 0.1085(2) 0.0177(11) Uani 1 d . . 
H11G H 0.8653(2) 0.1271(4) 0.0889(2) 0.021 Uiso 1 calc R . 
C114 C 0.8565(2) 0.1891(4) 0.1479(2) 0.0192(11) Uani 1 d . . 
H11H H 0.8702(2) 0.1339(4) 0.1715(2) 0.023 Uiso 1 calc R . 
H11I H 0.8629(2) 0.2545(4) 0.1657(2) 0.023 Uiso 1 calc R . 
C115 C 0.8046(2) 0.1734(4) 0.1238(2) 0.0276(13) Uani 1 d . . 
H11J H 0.7986(2) 0.1065(4) 0.1073(2) 0.033 Uiso 1 calc R . 
H11K H 0.7908(2) 0.1728(4) 0.1492(2) 0.033 Uiso 1 calc R . 
C116 C 0.7816(2) 0.2560(5) 0.0866(2) 0.0313(14) Uani 1 d . . 
H11L H 0.7487(2) 0.2396(5) 0.0698(2) 0.038 Uiso 1 calc R . 
H11M H 0.7838(2) 0.3217(5) 0.1036(2) 0.038 Uiso 1 calc R . 
C117 C 0.8047(2) 0.2651(5) 0.0492(2) 0.0317(14) Uani 1 d . . 
H11N H 0.7917(2) 0.3241(5) 0.0278(2) 0.038 Uiso 1 calc R . 
H11O H 0.7979(2) 0.2035(5) 0.0286(2) 0.038 Uiso 1 calc R . 
C118 C 0.8569(2) 0.2781(4) 0.0732(2) 0.0251(12) Uani 1 d . . 
H11P H 0.8640(2) 0.3432(4) 0.0912(2) 0.030 Uiso 1 calc R . 
H11Q H 0.8707(2) 0.2800(4) 0.0478(2) 0.030 Uiso 1 calc R . 
C201 C 0.8545(2) -0.1768(4) 0.3034(2) 0.0191(11) Uani 1 d . . 
H20A H 0.8477(2) -0.2357(4) 0.2804(2) 0.023 Uiso 1 calc R . 
C202 C 0.8137(2) -0.1708(5) 0.3205(2) 0.043(2) Uani 1 d . . 
H20B H 0.8196(2) -0.1177(5) 0.3459(2) 0.052 Uiso 1 calc R . 
H20C H 0.7856(2) -0.1516(5) 0.2928(2) 0.052 Uiso 1 calc R . 
C203 C 0.8060(2) -0.2718(6) 0.3411(2) 0.056(2) Uani 1 d . . 
H20D H 0.7800(2) -0.2655(6) 0.3526(2) 0.068 Uiso 1 calc R . 
H20E H 0.7977(2) -0.3236(6) 0.3150(2) 0.068 Uiso 1 calc R . 
C204 C 0.8482(2) -0.3066(5) 0.3830(2) 0.046(2) Uani 1 d . . 
H20F H 0.8426(2) -0.3748(5) 0.3938(2) 0.055 Uiso 1 calc R . 
H20G H 0.8544(2) -0.2593(5) 0.4107(2) 0.055 Uiso 1 calc R . 
C205 C 0.8902(2) -0.3108(4) 0.3678(2) 0.0346(15) Uani 1 d . . 
H20H H 0.8857(2) -0.3644(4) 0.3429(2) 0.042 Uiso 1 calc R . 
H20I H 0.9179(2) -0.3280(4) 0.3964(2) 0.042 Uiso 1 calc R . 
C206 C 0.8973(2) -0.2073(4) 0.3467(2) 0.0227(12) Uani 1 d . . 
H20J H 0.9040(2) -0.1547(4) 0.3724(2) 0.027 Uiso 1 calc R . 
H20K H 0.9239(2) -0.2117(4) 0.3362(2) 0.027 Uiso 1 calc R . 
C207 C 0.8443(2) 0.0457(4) 0.2944(2) 0.0192(11) Uani 1 d . . 
H20L H 0.8158(2) 0.0265(4) 0.3005(2) 0.023 Uiso 1 calc R . 
C208 C 0.8818(2) 0.0740(4) 0.3441(2) 0.0276(13) Uani 1 d . . 
H20M H 0.8868(2) 0.0161(4) 0.3669(2) 0.033 Uiso 1 calc R . 
H20N H 0.9111(2) 0.0879(4) 0.3394(2) 0.033 Uiso 1 calc R . 
C209 C 0.8677(2) 0.1670(5) 0.3658(2) 0.041(2) Uani 1 d . . 
H20O H 0.8408(2) 0.1495(5) 0.3746(2) 0.049 Uiso 1 calc R . 
H20P H 0.8932(2) 0.1865(5) 0.3961(2) 0.049 Uiso 1 calc R . 
C210 C 0.8555(2) 0.2559(4) 0.3317(2) 0.0366(15) Uani 1 d . . 
H21A H 0.8833(2) 0.2795(4) 0.3261(2) 0.044 Uiso 1 calc R . 
H21B H 0.8444(2) 0.3124(4) 0.3467(2) 0.044 Uiso 1 calc R . 
C211 C 0.8187(2) 0.2277(4) 0.2834(2) 0.0316(14) Uani 1 d . . 
H21C H 0.7899(2) 0.2113(4) 0.2887(2) 0.038 Uiso 1 calc R . 
H21D H 0.8125(2) 0.2866(4) 0.2611(2) 0.038 Uiso 1 calc R . 
C212 C 0.8328(2) 0.1378(4) 0.2601(2) 0.0228(12) Uani 1 d . . 
H21E H 0.8600(2) 0.1562(4) 0.2522(2) 0.027 Uiso 1 calc R . 
H21F H 0.8074(2) 0.1201(4) 0.2294(2) 0.027 Uiso 1 calc R . 
C213 C 0.8155(2) -0.0816(4) 0.2073(2) 0.0185(11) Uani 1 d . . 
H21G H 0.8214(2) -0.0283(4) 0.1861(2) 0.022 Uiso 1 calc R . 
C214 C 0.8194(2) -0.1824(4) 0.1834(2) 0.0195(11) Uani 1 d . . 
H21H H 0.8520(2) -0.1950(4) 0.1878(2) 0.023 Uiso 1 calc R . 
H21I H 0.8089(2) -0.2385(4) 0.1991(2) 0.023 Uiso 1 calc R . 
C215 C 0.7901(2) -0.1793(4) 0.1291(2) 0.0284(13) Uani 1 d . . 
H21J H 0.8019(2) -0.1257(4) 0.1130(2) 0.034 Uiso 1 calc R . 
H21K H 0.7924(2) -0.2451(4) 0.1139(2) 0.034 Uiso 1 calc R . 
C216 C 0.7399(2) -0.1577(5) 0.1213(2) 0.0349(14) Uani 1 d . . 
H21L H 0.7270(2) -0.2161(5) 0.1332(2) 0.042 Uiso 1 calc R . 
H21M H 0.7221(2) -0.1498(5) 0.0860(2) 0.042 Uiso 1 calc R . 
C217 C 0.7349(2) -0.0617(4) 0.1480(2) 0.0308(13) Uani 1 d . . 
H21N H 0.7436(2) -0.0019(4) 0.1329(2) 0.037 Uiso 1 calc R . 
H21O H 0.7024(2) -0.0536(4) 0.1447(2) 0.037 Uiso 1 calc R . 
C218 C 0.7652(2) -0.0662(4) 0.2019(2) 0.0241(12) Uani 1 d . . 
H21P H 0.7552(2) -0.1230(4) 0.2177(2) 0.029 Uiso 1 calc R . 
H21Q H 0.7621(2) -0.0023(4) 0.2182(2) 0.029 Uiso 1 calc R . 
C31 C 0.9769(2) -0.2855(4) 0.1115(2) 0.0308(14) Uani 1 d . . 
H31A H 1.0080(2) -0.2635(4) 0.1219(2) 0.037 Uiso 1 calc R . 
C32 C 0.9590(2) -0.3395(4) 0.0684(2) 0.0334(14) Uani 1 d . . 
H32A H 0.9781(2) -0.3528(4) 0.0503(2) 0.040 Uiso 1 calc R . 
C33 C 0.9147(2) -0.3744(4) 0.0511(2) 0.0265(13) Uani 1 d . . 
C34 C 0.8899(2) -0.3533(4) 0.0808(2) 0.0329(14) Uani 1 d . . 
H34A H 0.8591(2) -0.3768(4) 0.0717(2) 0.040 Uiso 1 calc R . 
C35 C 0.9094(2) -0.2981(4) 0.1238(2) 0.0287(13) Uani 1 d . . 
H35A H 0.8914(2) -0.2851(4) 0.1431(2) 0.034 Uiso 1 calc R . 
C36 C 0.8942(2) -0.4308(4) 0.0026(2) 0.038(2) Uani 1 d . . 
C37 C 0.8468(3) -0.4757(5) -0.0053(2) 0.059(2) Uani 1 d . . 
H37A H 0.8493(3) -0.5236(5) 0.0210(2) 0.089 Uiso 1 calc R . 
H37B H 0.8352(3) -0.5112(5) -0.0367(2) 0.089 Uiso 1 calc R . 
H37C H 0.8255(3) -0.4210(5) -0.0053(2) 0.089 Uiso 1 calc R . 
C38 C 0.9259(3) -0.5179(5) 0.0017(2) 0.059(2) Uani 1 d . . 
H38A H 0.9286(3) -0.5652(5) 0.0283(2) 0.088 Uiso 1 calc R . 
H38B H 0.9564(3) -0.4911(5) 0.0059(2) 0.088 Uiso 1 calc R . 
H38C H 0.9132(3) -0.5535(5) -0.0295(2) 0.088 Uiso 1 calc R . 
C39 C 0.8899(2) -0.3571(5) -0.0381(2) 0.058(2) Uani 1 d . . 
H39A H 0.8695(2) -0.3012(5) -0.0372(2) 0.087 Uiso 1 calc R . 
H39B H 0.8771(2) -0.3922(5) -0.0695(2) 0.087 Uiso 1 calc R . 
H39C H 0.9203(2) -0.3301(5) -0.0340(2) 0.087 Uiso 1 calc R . 
C1S C 0.7010(4) 0.5889(11) -0.0168(5) 0.080(5) Uiso 0.73(2) d P 1 
H1SA H 0.6693(4) 0.5989(11) -0.0393(5) 0.120 Uiso 0.73(2) calc PR 1 
H1SB H 0.7143(4) 0.5301(11) -0.0273(5) 0.120 Uiso 0.73(2) calc PR 1 
H1SC H 0.7192(4) 0.6495(11) -0.0168(5) 0.120 Uiso 0.73(2) calc PR 1 
C2S C 0.7015(4) 0.5706(9) 0.0338(4) 0.062(4) Uiso 0.73(2) d P 1 
H2SA H 0.6825(4) 0.5107(9) 0.0342(4) 0.074 Uiso 0.73(2) calc PR 1 
H2SB H 0.6892(4) 0.6304(9) 0.0454(4) 0.074 Uiso 0.73(2) calc PR 1 
C3S C 0.7529(3) 0.5519(6) 0.0667(3) 0.069(2) Uiso 1 d . . 
H3SA H 0.7647(3) 0.4914(6) 0.0551(3) 0.083 Uiso 0.73(2) calc PR 1 
H3SB H 0.7718(3) 0.6111(6) 0.0649(3) 0.083 Uiso 0.73(2) calc PR 1 
H3SC H 0.7825(3) 0.5727(6) 0.0670(3) 0.083 Uiso 0.27(2) d PR 2 
H3SD H 0.7925(3) 0.5527(6) 0.0870(3) 0.083 Uiso 0.27(2) d PR 2 
C4S C 0.7565(3) 0.5360(6) 0.1185(3) 0.068(2) Uiso 1 d . . 
H4SA H 0.7396(3) 0.4734(6) 0.1200(3) 0.081 Uiso 1 calc R . 
H4SB H 0.7412(3) 0.5934(6) 0.1281(3) 0.081 Uiso 1 calc R . 
C5S C 0.8053(2) 0.5273(6) 0.1552(3) 0.057(2) Uiso 1 d . . 
H5SA H 0.8224(2) 0.5904(6) 0.1549(3) 0.069 Uiso 1 calc R . 
H5SB H 0.8211(2) 0.4703(6) 0.1460(3) 0.069 Uiso 1 calc R . 
C6S C 0.8054(3) 0.5090(7) 0.2073(3) 0.077(3) Uiso 1 d . . 
H6SA H 0.7899(3) 0.5663(7) 0.2168(3) 0.092 Uiso 1 calc R . 
H6SB H 0.7881(3) 0.4462(7) 0.2077(3) 0.092 Uiso 1 calc R . 
C7S C 0.8527(3) 0.4997(7) 0.2427(3) 0.100(3) Uiso 1 d . . 
H7SA H 0.8520(3) 0.4882(7) 0.2753(3) 0.151 Uiso 1 calc R . 
H7SB H 0.8697(3) 0.5622(7) 0.2427(3) 0.151 Uiso 1 calc R . 
H7SC H 0.8679(3) 0.4423(7) 0.2336(3) 0.151 Uiso 1 calc R . 
C1S' C 0.6889(11) 0.6381(30) -0.0011(12) 0.075(13) Uiso 0.27(2) d P 2 
H1SD H 0.6662(11) 0.6298(30) -0.0342(12) 0.113 Uiso 0.27(2) calc PR 2 
H1SE H 0.7102(11) 0.6930(30) -0.0009(12) 0.113 Uiso 0.27(2) calc PR 2 
H1SF H 0.6731(11) 0.6549(30) 0.0212(12) 0.113 Uiso 0.27(2) calc PR 2 
C2S' C 0.7169(13) 0.5353(29) 0.0159(13) 0.079(13) Uiso 0.27(2) d P 2 
H2SC H 0.6958(13) 0.4798(29) 0.0166(13) 0.094 Uiso 0.27(2) calc PR 2 
H2SD H 0.7321(13) 0.5164(29) -0.0071(13) 0.094 Uiso 0.27(2) calc PR 2 
  
loop_ 
 _atom_site_aniso_label 
 _atom_site_aniso_U_11 
 _atom_site_aniso_U_22 
 _atom_site_aniso_U_33 
 _atom_site_aniso_U_23 
 _atom_site_aniso_U_13 
 _atom_site_aniso_U_12 
W1 0.01050(9) 0.01151(9) 0.00904(9) 0.00029(9) 0.00355(7) 0.00026(9) 
W2 0.01010(9) 0.01134(9) 0.00999(9) 0.00025(8) 0.00402(7) -0.00084(8) 
W3 0.01179(10) 0.01151(10) 0.01023(10) -0.00144(8) 0.00342(8) -0.00009(8) 
S1 0.0130(6) 0.0162(6) 0.0124(6) 0.0001(5) 0.0023(5) 0.0002(5) 
S2 0.0147(6) 0.0104(6) 0.0178(7) -0.0020(5) 0.0064(5) 0.0033(5) 
S3 0.0157(6) 0.0143(6) 0.0172(6) -0.0013(5) 0.0059(5) -0.0017(5) 
S4 0.0159(6) 0.0188(6) 0.0114(6) -0.0001(5) 0.0070(5) 0.0010(6) 
P1 0.0150(7) 0.0145(7) 0.0122(6) 0.0014(5) 0.0048(5) 0.0018(5) 
P2 0.0141(6) 0.0166(7) 0.0146(6) 0.0009(5) 0.0064(5) -0.0003(5) 
N1 0.018(2) 0.016(2) 0.015(2) -0.003(2) 0.002(2) -0.001(2) 
C101 0.027(3) 0.014(3) 0.015(3) 0.006(2) 0.006(2) 0.003(2) 
C102 0.033(3) 0.022(3) 0.016(3) -0.003(2) 0.007(2) -0.006(2) 
C103 0.048(4) 0.030(4) 0.022(3) -0.003(2) 0.007(3) -0.002(3) 
C104 0.040(4) 0.024(3) 0.040(4) 0.000(3) -0.001(3) -0.010(3) 
C105 0.025(3) 0.028(3) 0.044(4) 0.012(3) 0.007(3) -0.003(2) 
C106 0.022(3) 0.022(3) 0.025(3) 0.008(2) 0.005(2) 0.001(2) 
C107 0.020(3) 0.022(3) 0.010(2) 0.002(2) 0.006(2) 0.002(2) 
C108 0.025(3) 0.023(3) 0.021(3) -0.006(2) 0.008(2) -0.002(2) 
C109 0.042(4) 0.034(3) 0.017(3) -0.011(2) 0.014(3) -0.005(3) 
C110 0.044(4) 0.057(4) 0.020(3) -0.007(3) 0.014(3) 0.008(4) 
C111 0.053(4) 0.044(4) 0.019(3) 0.010(3) 0.019(3) 0.013(3) 
C112 0.047(4) 0.027(3) 0.018(3) 0.005(2) 0.020(3) 0.010(3) 
C113 0.016(3) 0.023(3) 0.014(3) 0.000(2) 0.004(2) 0.001(2) 
C114 0.021(3) 0.023(3) 0.014(3) 0.002(2) 0.006(2) 0.004(2) 
C115 0.022(3) 0.033(3) 0.032(3) 0.006(3) 0.015(3) 0.003(3) 
C116 0.014(3) 0.051(4) 0.029(3) 0.013(3) 0.007(2) 0.011(3) 
C117 0.021(3) 0.046(4) 0.024(3) 0.012(3) 0.005(2) 0.009(3) 
C118 0.023(3) 0.030(3) 0.021(3) 0.010(2) 0.007(2) 0.007(2) 
C201 0.018(3) 0.021(3) 0.016(3) 0.002(2) 0.005(2) -0.004(2) 
C202 0.026(3) 0.065(5) 0.043(4) 0.031(3) 0.020(3) 0.003(3) 
C203 0.033(4) 0.083(6) 0.056(5) 0.035(4) 0.019(3) -0.012(4) 
C204 0.028(4) 0.067(5) 0.043(4) 0.026(3) 0.012(3) -0.012(3) 
C205 0.039(4) 0.034(4) 0.029(3) 0.014(3) 0.011(3) 0.003(3) 
C206 0.020(3) 0.028(3) 0.021(3) 0.007(2) 0.009(2) 0.000(2) 
C207 0.018(3) 0.020(3) 0.023(3) 0.001(2) 0.011(2) 0.003(2) 
C208 0.036(3) 0.026(3) 0.021(3) -0.004(2) 0.011(3) 0.002(3) 
C209 0.038(4) 0.047(4) 0.037(4) -0.021(3) 0.014(3) 0.005(3) 
C210 0.037(4) 0.030(3) 0.044(4) -0.015(3) 0.015(3) 0.004(3) 
C211 0.031(3) 0.026(3) 0.048(4) -0.003(3) 0.026(3) 0.005(3) 
C212 0.018(3) 0.024(3) 0.027(3) 0.005(2) 0.010(2) 0.003(2) 
C213 0.018(3) 0.022(3) 0.014(3) 0.001(2) 0.005(2) -0.001(2) 
C214 0.016(3) 0.022(3) 0.019(3) -0.002(2) 0.004(2) -0.002(2) 
C215 0.030(3) 0.030(3) 0.019(3) -0.003(2) 0.002(2) -0.004(3) 
C216 0.031(3) 0.039(4) 0.025(3) 0.001(3) -0.001(3) -0.005(3) 
C217 0.015(3) 0.036(4) 0.033(3) 0.000(3) -0.002(2) -0.006(3) 
C218 0.017(3) 0.029(3) 0.026(3) 0.001(2) 0.007(2) 0.000(2) 
C31 0.029(3) 0.031(3) 0.037(4) -0.016(3) 0.018(3) -0.009(3) 
C32 0.042(4) 0.033(3) 0.033(3) -0.014(3) 0.023(3) -0.004(3) 
C33 0.041(4) 0.015(3) 0.015(3) 0.001(2) 0.000(2) 0.006(3) 
C34 0.020(3) 0.029(3) 0.041(4) -0.015(3) 0.002(3) 0.001(3) 
C35 0.025(3) 0.027(3) 0.032(3) -0.012(3) 0.008(3) -0.005(2) 
C36 0.057(4) 0.030(4) 0.016(3) -0.001(3) -0.001(3) -0.004(3) 
C37 0.077(6) 0.058(5) 0.027(4) -0.013(3) 0.000(4) -0.032(4) 
C38 0.081(6) 0.037(4) 0.044(4) -0.024(3) 0.004(4) 0.009(4) 
C39 0.075(6) 0.062(5) 0.023(4) 0.009(3) 0.002(3) -0.007(4) 
  
_geom_special_details 
; 
 All esds (except the esd in the dihedral angle between two l.s. planes) 
 are estimated using the full covariance matrix.  The cell esds are taken 
 into account individually in the estimation of esds in distances, angles 
 and torsion angles; correlations between esds in cell parameters are only 
 used when they are defined by crystal symmetry.  An approximate (isotropic) 
 treatment of cell esds is used for estimating esds involving l.s. planes. 
; 
  
loop_ 
 _geom_bond_atom_site_label_1 
 _geom_bond_atom_site_label_2 
 _geom_bond_distance 
 _geom_bond_site_symmetry_2 
 _geom_bond_publ_flag 
W1 S2 2.4422(12) 2_755 ? 
W1 S2 2.4437(11) . ? 
W1 S4 2.4538(11) . ? 
W1 S1 2.4586(12) . ? 
W1 P1 2.5960(12) . ? 
W1 W3 2.6701(3) . ? 
W1 W2 2.6886(3) . ? 
W1 W1 2.6928(3) 2_755 ? 
W1 W2 2.7099(3) 2_755 ? 
W2 S4 2.4427(11) 2_755 ? 
W2 S1 2.4506(11) . ? 
W2 S2 2.4589(12) . ? 
W2 S3 2.4801(13) . ? 
W2 P2 2.6037(12) . ? 
W2 W3 2.6573(3) 2_755 ? 
W2 W3 2.6768(3) . ? 
W2 W1 2.7099(3) 2_755 ? 
W3 N1 2.259(4) . ? 
W3 S1 2.4444(12) . ? 
W3 S4 2.4481(11) . ? 
W3 S3 2.4562(12) . ? 
W3 S3 2.4671(12) 2_755 ? 
W3 W2 2.6573(3) 2_755 ? 
W3 W3 2.6648(4) 2_755 ? 
S2 W1 2.4422(12) 2_755 ? 
S3 W3 2.4671(12) 2_755 ? 
S4 W2 2.4427(11) 2_755 ? 
P1 C101 1.863(5) . ? 
P1 C113 1.866(5) . ? 
P1 C107 1.876(4) . ? 
P2 C207 1.855(5) . ? 
P2 C201 1.866(5) . ? 
P2 C213 1.870(5) . ? 
N1 C35 1.332(6) . ? 
N1 C31 1.336(6) . ? 
C101 C106 1.527(7) . ? 
C101 C102 1.528(6) . ? 
C102 C103 1.535(7) . ? 
C103 C104 1.508(8) . ? 
C104 C105 1.518(8) . ? 
C105 C106 1.524(7) . ? 
C107 C108 1.530(6) . ? 
C107 C112 1.541(6) . ? 
C108 C109 1.517(6) . ? 
C109 C110 1.528(7) . ? 
C110 C111 1.519(8) . ? 
C111 C112 1.524(7) . ? 
C113 C114 1.531(6) . ? 
C113 C118 1.542(6) . ? 
C114 C115 1.530(7) . ? 
C115 C116 1.526(7) . ? 
C116 C117 1.524(6) . ? 
C117 C118 1.532(7) . ? 
C201 C206 1.528(7) . ? 
C201 C202 1.534(7) . ? 
C202 C203 1.517(8) . ? 
C203 C204 1.510(8) . ? 
C204 C205 1.531(7) . ? 
C205 C206 1.546(7) . ? 
C207 C212 1.536(7) . ? 
C207 C208 1.550(7) . ? 
C208 C209 1.521(7) . ? 
C209 C210 1.500(8) . ? 
C210 C211 1.514(7) . ? 
C211 C212 1.512(7) . ? 
C213 C214 1.530(6) . ? 
C213 C218 1.531(6) . ? 
C214 C215 1.528(7) . ? 
C215 C216 1.526(7) . ? 
C216 C217 1.526(7) . ? 
C217 C218 1.525(7) . ? 
C31 C32 1.382(7) . ? 
C32 C33 1.367(7) . ? 
C33 C34 1.393(7) . ? 
C33 C36 1.529(7) . ? 
C34 C35 1.393(7) . ? 
C36 C39 1.509(8) . ? 
C36 C38 1.522(8) . ? 
C36 C37 1.531(9) . ? 
C1S C2S 1.50(2) . ? 
C2S C3S 1.564(13) . ? 
C3S C4S 1.503(9) . ? 
C3S C2S' 1.53(3) . ? 
C4S C5S 1.517(10) . ? 
C5S C6S 1.552(9) . ? 
C6S C7S 1.469(11) . ? 
C1S' C2S' 1.59(6) . ? 
  
loop_ 
 _geom_angle_atom_site_label_1 
 _geom_angle_atom_site_label_2 
 _geom_angle_atom_site_label_3 
 _geom_angle 
 _geom_angle_site_symmetry_1 
 _geom_angle_site_symmetry_3 
 _geom_angle_publ_flag 
S2 W1 S2 89.60(5) 2_755 . ? 
S2 W1 S4 88.59(4) 2_755 . ? 
S2 W1 S4 171.43(4) . . ? 
S2 W1 S1 171.55(4) 2_755 . ? 
S2 W1 S1 90.64(4) . . ? 
S4 W1 S1 89.93(4) . . ? 
S2 W1 P1 100.17(4) 2_755 . ? 
S2 W1 P1 96.22(4) . . ? 
S4 W1 P1 92.34(4) . . ? 
S1 W1 P1 88.21(4) . . ? 
S2 W1 W3 115.88(3) 2_755 . ? 
S2 W1 W3 116.83(3) . . ? 
S4 W1 W3 56.89(3) . . ? 
S1 W1 W3 56.75(3) . . ? 
P1 W1 W3 129.66(3) . . ? 
S2 W1 W2 116.98(3) 2_755 . ? 
S2 W1 W2 57.01(3) . . ? 
S4 W1 W2 116.77(3) . . ? 
S1 W1 W2 56.65(3) . . ? 
P1 W1 W2 131.80(3) . . ? 
W3 W1 W2 59.936(7) . . ? 
S2 W1 W1 56.58(3) 2_755 2_755 ? 
S2 W1 W1 56.53(3) . 2_755 ? 
S4 W1 W1 115.87(3) . 2_755 ? 
S1 W1 W1 117.03(3) . 2_755 ? 
P1 W1 W1 140.55(3) . 2_755 ? 
W3 W1 W1 89.693(5) . 2_755 ? 
W2 W1 W1 60.472(7) . 2_755 ? 
S2 W1 W2 56.73(3) 2_755 2_755 ? 
S2 W1 W2 116.15(3) . 2_755 ? 
S4 W1 W2 56.20(3) . 2_755 ? 
S1 W1 W2 115.89(3) . 2_755 ? 
P1 W1 W2 137.91(3) . 2_755 ? 
W3 W1 W2 59.193(7) . 2_755 ? 
W2 W1 W2 89.684(9) . 2_755 ? 
W1 W1 W2 59.688(7) 2_755 2_755 ? 
S4 W2 S1 172.12(4) 2_755 . ? 
S4 W2 S2 88.46(4) 2_755 . ? 
S1 W2 S2 90.47(4) . . ? 
S4 W2 S3 91.11(4) 2_755 . ? 
S1 W2 S3 88.77(4) . . ? 
S2 W2 S3 171.33(4) . . ? 
S4 W2 P2 94.05(4) 2_755 . ? 
S1 W2 P2 93.83(4) . . ? 
S2 W2 P2 98.11(4) . . ? 
S3 W2 P2 90.56(4) . . ? 
S4 W2 W3 57.19(3) 2_755 2_755 ? 
S1 W2 W3 116.65(3) . 2_755 ? 
S2 W2 W3 115.76(3) . 2_755 ? 
S3 W2 W3 57.28(3) . 2_755 ? 
P2 W2 W3 132.63(3) . 2_755 ? 
S4 W2 W3 117.03(3) 2_755 . ? 
S1 W2 W3 56.74(3) . . ? 
S2 W2 W3 116.04(3) . . ? 
S3 W2 W3 56.73(3) . . ? 
P2 W2 W3 132.90(3) . . ? 
W3 W2 W3 59.942(8) 2_755 . ? 
S4 W2 W1 116.42(3) 2_755 . ? 
S1 W2 W1 56.94(3) . . ? 
S2 W2 W1 56.47(3) . . ? 
S3 W2 W1 116.40(3) . . ? 
P2 W2 W1 137.22(3) . . ? 
W3 W2 W1 90.054(8) 2_755 . ? 
W3 W2 W1 59.688(6) . . ? 
S4 W2 W1 56.59(3) 2_755 2_755 ? 
S1 W2 W1 116.69(3) . 2_755 ? 
S2 W2 W1 56.14(3) . 2_755 ? 
S3 W2 W1 116.83(3) . 2_755 ? 
P2 W2 W1 137.82(3) . 2_755 ? 
W3 W2 W1 59.658(7) 2_755 2_755 ? 
W3 W2 W1 89.189(7) . 2_755 ? 
W1 W2 W1 59.840(8) . 2_755 ? 
N1 W3 S1 90.13(10) . . ? 
N1 W3 S4 90.04(10) . . ? 
S1 W3 S4 90.40(4) . . ? 
N1 W3 S3 96.25(10) . . ? 
S1 W3 S3 89.46(4) . . ? 
S4 W3 S3 173.71(4) . . ? 
N1 W3 S3 96.30(10) . 2_755 ? 
S1 W3 S3 173.34(4) . 2_755 ? 
S4 W3 S3 91.29(4) . 2_755 ? 
S3 W3 S3 88.15(5) . 2_755 ? 
N1 W3 W2 133.86(10) . 2_755 ? 
S1 W3 W2 118.36(3) . 2_755 ? 
S4 W3 W2 56.99(3) . 2_755 ? 
S3 W3 W2 117.82(3) . 2_755 ? 
S3 W3 W2 57.75(3) 2_755 2_755 ? 
N1 W3 W3 139.87(10) . 2_755 ? 
S1 W3 W3 116.60(3) . 2_755 ? 
S4 W3 W3 117.28(3) . 2_755 ? 
S3 W3 W3 57.43(3) . 2_755 ? 
S3 W3 W3 57.03(3) 2_755 2_755 ? 
W2 W3 W3 60.392(7) 2_755 2_755 ? 
N1 W3 W1 129.84(10) . . ? 
S1 W3 W1 57.26(3) . . ? 
S4 W3 W1 57.10(3) . . ? 
S3 W3 W1 117.95(3) . . ? 
S3 W3 W1 118.79(3) 2_755 . ? 
W2 W3 W1 61.149(7) 2_755 . ? 
W3 W3 W1 90.294(5) 2_755 . ? 
N1 W3 W2 134.74(10) . . ? 
S1 W3 W2 56.96(3) . . ? 
S4 W3 W2 117.41(3) . . ? 
S3 W3 W2 57.59(3) . . ? 
S3 W3 W2 116.70(3) 2_755 . ? 
W2 W3 W2 91.067(9) 2_755 . ? 
W3 W3 W2 59.665(7) 2_755 . ? 
W1 W3 W2 60.376(7) . . ? 
W3 S1 W2 66.30(3) . . ? 
W3 S1 W1 65.99(3) . . ? 
W2 S1 W1 66.41(3) . . ? 
W1 S2 W1 66.89(3) 2_755 . ? 
W1 S2 W2 67.13(3) 2_755 . ? 
W1 S2 W2 66.52(3) . . ? 
W3 S3 W3 65.54(3) . 2_755 ? 
W3 S3 W2 65.68(3) . . ? 
W3 S3 W2 64.98(3) 2_755 . ? 
W2 S4 W3 65.82(3) 2_755 . ? 
W2 S4 W1 67.20(3) 2_755 . ? 
W3 S4 W1 66.01(3) . . ? 
C101 P1 C113 105.1(2) . . ? 
C101 P1 C107 103.4(2) . . ? 
C113 P1 C107 102.7(2) . . ? 
C101 P1 W1 118.4(2) . . ? 
C113 P1 W1 115.5(2) . . ? 
C107 P1 W1 110.0(2) . . ? 
C207 P2 C201 104.9(2) . . ? 
C207 P2 C213 103.3(2) . . ? 
C201 P2 C213 103.1(2) . . ? 
C207 P2 W2 116.7(2) . . ? 
C201 P2 W2 116.7(2) . . ? 
C213 P2 W2 110.5(2) . . ? 
C35 N1 C31 116.4(4) . . ? 
C35 N1 W3 122.0(3) . . ? 
C31 N1 W3 121.1(3) . . ? 
C106 C101 C102 110.4(4) . . ? 
C106 C101 P1 112.9(3) . . ? 
C102 C101 P1 111.3(3) . . ? 
C101 C102 C103 110.1(4) . . ? 
C104 C103 C102 111.8(5) . . ? 
C103 C104 C105 111.1(5) . . ? 
C104 C105 C106 110.7(5) . . ? 
C105 C106 C101 110.9(4) . . ? 
C108 C107 C112 109.2(4) . . ? 
C108 C107 P1 111.9(3) . . ? 
C112 C107 P1 119.0(3) . . ? 
C109 C108 C107 111.1(4) . . ? 
C108 C109 C110 111.2(5) . . ? 
C111 C110 C109 111.4(5) . . ? 
C112 C111 C110 111.9(5) . . ? 
C111 C112 C107 109.0(4) . . ? 
C114 C113 C118 108.7(4) . . ? 
C114 C113 P1 117.1(3) . . ? 
C118 C113 P1 115.8(3) . . ? 
C115 C114 C113 109.1(4) . . ? 
C116 C115 C114 112.2(4) . . ? 
C117 C116 C115 110.7(4) . . ? 
C116 C117 C118 112.2(4) . . ? 
C117 C118 C113 110.1(4) . . ? 
C206 C201 C202 108.5(4) . . ? 
C206 C201 P2 114.6(3) . . ? 
C202 C201 P2 116.4(4) . . ? 
C203 C202 C201 110.8(5) . . ? 
C204 C203 C202 112.1(5) . . ? 
C203 C204 C205 110.9(5) . . ? 
C204 C205 C206 110.4(5) . . ? 
C201 C206 C205 111.0(4) . . ? 
C212 C207 C208 110.2(4) . . ? 
C212 C207 P2 112.7(3) . . ? 
C208 C207 P2 110.1(3) . . ? 
C209 C208 C207 110.8(5) . . ? 
C210 C209 C208 112.9(5) . . ? 
C209 C210 C211 111.0(5) . . ? 
C212 C211 C210 111.8(5) . . ? 
C211 C212 C207 111.0(4) . . ? 
C214 C213 C218 108.6(4) . . ? 
C214 C213 P2 111.5(3) . . ? 
C218 C213 P2 120.6(3) . . ? 
C215 C214 C213 109.9(4) . . ? 
C216 C215 C214 110.7(4) . . ? 
C215 C216 C217 111.7(4) . . ? 
C218 C217 C216 111.3(5) . . ? 
C217 C218 C213 109.7(4) . . ? 
N1 C31 C32 123.0(5) . . ? 
C33 C32 C31 122.1(5) . . ? 
C32 C33 C34 114.7(5) . . ? 
C32 C33 C36 122.4(5) . . ? 
C34 C33 C36 123.0(5) . . ? 
C35 C34 C33 120.9(5) . . ? 
N1 C35 C34 123.0(5) . . ? 
C39 C36 C38 110.1(6) . . ? 
C39 C36 C33 108.4(5) . . ? 
C38 C36 C33 109.1(5) . . ? 
C39 C36 C37 109.0(5) . . ? 
C38 C36 C37 107.7(6) . . ? 
C33 C36 C37 112.5(5) . . ? 
C1S C2S C3S 106.1(10) . . ? 
C4S C3S C2S 109.4(7) . . ? 
C4S C3S C2S' 137.1(16) . . ? 
C3S C4S C5S 114.8(6) . . ? 
C4S C5S C6S 111.0(6) . . ? 
C7S C6S C5S 110.7(7) . . ? 
C3S C2S' C1S' 108.1(28) . . ? 
  
_refine_diff_density_max    0.933 
_refine_diff_density_min   -2.434 
_refine_diff_density_rms    0.191 

  
#===END
 
 
data_W6S8(C4H11N)6  
 
_audit_creation_method            SHELXL 
_chemical_name_systematic 
; 
 octakis(\m~3~-sulfido)-hexakis(n-butylamine)-hexa-tungsten 
; 
_chemical_name_common             'Tungsten Sulfide cluster'
_chemical_formula_moiety          'W6 S8 (C4H11N)6' 
_chemical_formula_structural      ? 
_chemical_formula_analytical      ? 
_chemical_formula_sum             'C24 H66 N6 S8 W6' 
_chemical_formula_weight          1798.41 
_chemical_melting_point           'not measured' 
_chemical_compound_source         ? 
 
loop_ 
 _atom_type_symbol 
 _atom_type_description 
 _atom_type_scat_dispersion_real 
 _atom_type_scat_dispersion_imag 
 _atom_type_scat_source 
 'C'  'C'   0.0033   0.0016 
 'International Tables Vol C Tables 4.2.6.8 and 6.1.1.4' 
 'H'  'H'   0.0000   0.0000 
 'International Tables Vol C Tables 4.2.6.8 and 6.1.1.4' 
 'N'  'N'   0.0061   0.0033 
 'International Tables Vol C Tables 4.2.6.8 and 6.1.1.4' 
 'S'  'S'   0.1246   0.1234 
 'International Tables Vol C Tables 4.2.6.8 and 6.1.1.4' 
 'W'  'W'  -0.8490   6.8722 
 'International Tables Vol C Tables 4.2.6.8 and 6.1.1.4' 
 
_symmetry_cell_setting            monoclinic
_symmetry_space_group_name_H-M    'c2/m' 
 
loop_ 
 _symmetry_equiv_pos_as_xyz 
 'x, y, z' 
 '-x, y, -z' 
 'x+1/2, y+1/2, z' 
 '-x+1/2, y+1/2, -z' 
 '-x, -y, -z' 
 'x, -y, z' 
 '-x+1/2, -y+1/2, -z' 
 'x+1/2, -y+1/2, z' 
 
_cell_length_a                    10.0667(11) 
_cell_length_b                    17.699(2) 
_cell_length_c                    14.374(2) 
_cell_angle_alpha                 90.00 
_cell_angle_beta                  105.171(2) 
_cell_angle_gamma                 90.00 
_cell_volume                      2471.8(5) 
_cell_formula_units_Z             2 
_cell_measurement_temperature     298(2) 
_cell_measurement_reflns_used     ? 
_cell_measurement_theta_min       ? 
_cell_measurement_theta_max       ? 
 
_exptl_crystal_description        BLOCKS 
_exptl_crystal_colour             DARK-RED 
_exptl_crystal_size_max           0.1 
_exptl_crystal_size_mid           0.1 
_exptl_crystal_size_min           0.05 
_exptl_crystal_density_meas       'not measured' 
_exptl_crystal_density_diffrn     2.416 
_exptl_crystal_density_method     'not measured' 
_exptl_crystal_F_000              1648 
_exptl_absorpt_coefficient_mu     14.264 
_exptl_absorpt_correction_type    psi-scan 
_exptl_absorpt_correction_T_min   0.4047 
_exptl_absorpt_correction_T_max   0.9279 
_exptl_absorpt_process_details    
;
SADABS
; 
_exptl_special_details 
; 
sealed in a capillary with mother liquid 
; 
 
_diffrn_ambient_temperature       298(2) 
_diffrn_radiation_wavelength      0.71073 
_diffrn_radiation_type            MoK\a 
_diffrn_radiation_source          'fine-focus sealed tube' 
_diffrn_radiation_monochromator   graphite 
_diffrn_measurement_device        'Siemens SMART CCD Diffractometer'  
_diffrn_measurement_method        '\w scans' 
_diffrn_standards_number          ? 
_diffrn_standards_interval_count  ? 
_diffrn_standards_interval_time   ? 
_diffrn_standards_decay_%         0 
_diffrn_reflns_number             5274 
_diffrn_reflns_av_R_equivalents   0.1166 
_diffrn_reflns_av_sigmaI/netI     0.1367 
_diffrn_reflns_limit_h_min        -10 
_diffrn_reflns_limit_h_max        11 
_diffrn_reflns_limit_k_min        -19 
_diffrn_reflns_limit_k_max        18 
_diffrn_reflns_limit_l_min        -15 
_diffrn_reflns_limit_l_max        15 
_diffrn_reflns_theta_min          1.47 
_diffrn_reflns_theta_max          23.28 
_reflns_number_total              1831 
_reflns_number_observed           998 
_reflns_observed_criterion        >2sigma(I) 
 
_computing_data_collection        'BRUKER SMART'
_computing_cell_refinement        'BRUKER SAINT' 
_computing_data_reduction         SHELXTL 
_computing_structure_solution     'SHELXS-86 (Sheldrick, 1990)' 
_computing_structure_refinement   'SHELXL-93 (Sheldrick, 1993)' 
_computing_molecular_graphics     SHELXTL 
_computing_publication_material   SHELXTL 
 
_refine_special_details 
; 
 Refinement on F^2^ for ALL reflections except for 0 with very negative F^2^ 
 or flagged by the user for potential systematic errors.  Weighted R-factors 
 wR and all goodnesses of fit S are based on F^2^, conventional R-factors R 
 are based on F, with F set to zero for negative F^2^. The observed criterion 
 of F^2^ > 2sigma(F^2^) is used only for calculating _R_factor_obs etc. and is 
 not relevant to the choice of reflections for refinement.  R-factors based 
 on F^2^ are statistically about twice as large as those based on F, and R- 
 factors based on ALL data will be even larger. 
; 
 
_refine_ls_structure_factor_coef  Fsqd  
_refine_ls_matrix_type            full 
_refine_ls_weighting_scheme 
 'calc w=1/[\s^2^(Fo^2^)+(0.1180P)^2^+0.0000P] where P=(Fo^2^+2Fc^2^)/3' 
_atom_sites_solution_primary      direct 
_atom_sites_solution_secondary    difmap 
_atom_sites_solution_hydrogens    geom 
_refine_ls_hydrogen_treatment     mixed 
_refine_ls_extinction_method      none 
_refine_ls_extinction_coef        ? 
_refine_ls_number_reflns          1831 
_refine_ls_number_parameters      72 
_refine_ls_number_restraints      8 
_refine_ls_R_factor_all           0.1540 
_refine_ls_R_factor_obs           0.0768 
_refine_ls_wR_factor_all          0.2482 
_refine_ls_wR_factor_obs          0.2022 
_refine_ls_goodness_of_fit_all    1.092 
_refine_ls_goodness_of_fit_obs    1.211 
_refine_ls_restrained_S_all       1.089 
_refine_ls_restrained_S_obs       1.206 
_refine_ls_shift/esd_max          -0.003 
_refine_ls_shift/esd_mean         0.001 
 
loop_ 
 _atom_site_label 
 _atom_site_type_symbol 
 _atom_site_fract_x 
 _atom_site_fract_y 
 _atom_site_fract_z 
 _atom_site_U_iso_or_equiv 
 _atom_site_thermal_displace_type 
 _atom_site_occupancy 
 _atom_site_calc_flag 
 _atom_site_refinement_flags 
 _atom_site_disorder_group 
W1 W -0.8170(2) 0.5000 0.57673(15) 0.0405(7) Uani 1 d S . 
W2 W -0.95535(14) 0.42511(8) 0.42114(10) 0.0419(6) Uani 1 d . . 
S1 S -0.7478(12) 0.5000 0.4248(10) 0.046(3) Uani 1 d S . 
S2 S -0.9112(15) 0.5000 0.7173(10) 0.060(4) Uani 1 d S . 
S3 S -1.1667(9) 0.3613(6) 0.4316(7) 0.057(3) Uani 1 d . . 
N1 N -0.5979(50) 0.5000 0.6605(34) 0.087(16) Uiso 1 d SD . 
H1A H -0.5579(50) 0.4592 0.6421(34) 0.104 Uiso 0.50 calc PR . 
H1B H -0.5579(50) 0.5408 0.6421(34) 0.104 Uiso 0.50 calc PR . 
N2 N -0.9094(36) 0.3348(22) 0.3201(25) 0.090(11) Uiso 1 d D . 
H2A H -0.8722(36) 0.2960(22) 0.3587(25) 0.108 Uiso 1 calc R . 
H2B H -0.9924(36) 0.3186(22) 0.2855(25) 0.108 Uiso 1 calc R . 
C1 C -0.5615(62) 0.5000 0.7687(35) 0.116(26) Uiso 1 d SD . 
H1B H -0.6012(62) 0.4557 0.7907(35) 0.140 Uiso 0.50 calc PR . 
H1C H -0.6012(62) 0.5443 0.7907(35) 0.140 Uiso 0.50 calc PR . 
C2 C -0.4062(61) 0.5000 0.8129(47) 0.111(25) Uiso 1 d SD . 
H2B H -0.3707(61) 0.4561 0.7868(47) 0.133 Uiso 0.50 calc PR . 
H2C H -0.3707(61) 0.5439 0.7868(47) 0.133 Uiso 0.50 calc PR . 
C3 C -0.3386(81) 0.5000 0.9199(48) 0.130(30) Uiso 1 d SD . 
H3A H -0.3764(81) 0.4563 0.9446(48) 0.156 Uiso 0.50 calc PR . 
H3B H -0.3764(81) 0.5437 0.9446(48) 0.156 Uiso 0.50 calc PR . 
C4 C -0.1875(85) 0.5000 0.9725(80) 0.263(66) Uiso 1 d SD . 
H4A H -0.1775(85) 0.5000 1.0407(80) 0.394 Uiso 1 calc SR . 
H4B H -0.1445(85) 0.5443 0.9550(80) 0.394 Uiso 0.50 calc PR . 
H4C H -0.1445(85) 0.4557 0.9550(80) 0.394 Uiso 0.50 calc PR . 
C5 C -0.8238(75) 0.3414(51) 0.2485(48) 0.255(43) Uiso 1 d D . 
H5A H -0.7298(75) 0.3455(51) 0.2879(48) 0.306 Uiso 1 calc R . 
H5B H -0.8467(75) 0.3907(51) 0.2193(48) 0.306 Uiso 1 calc R . 
C6 C -0.8146(67) 0.2905(39) 0.1656(50) 0.169(28) Uiso 1 d D . 
H6A H -0.8323(67) 0.3203(39) 0.1070(50) 0.203 Uiso 1 calc R . 
H6B H -0.7216(67) 0.2708(39) 0.1780(50) 0.203 Uiso 1 calc R . 
C7 C -0.9144(68) 0.2247(40) 0.1497(59) 0.216(38) Uiso 1 d D . 
H7A H -1.0062(68) 0.2389(40) 0.1129(59) 0.259 Uiso 1 calc R . 
H7B H -0.9183(68) 0.2006(40) 0.2095(59) 0.259 Uiso 1 calc R . 
C8 C -0.8390(52) 0.1768(36) 0.0912(38) 0.146(23) Uiso 1 d D . 
H8A H -0.8878(52) 0.1302(36) 0.0732(38) 0.219 Uiso 1 calc R . 
H8B H -0.7475(52) 0.1662(36) 0.1295(38) 0.219 Uiso 1 calc R . 
H8C H -0.8344(52) 0.2038(36) 0.0343(38) 0.219 Uiso 1 calc R . 
 
loop_ 
 _atom_site_aniso_label 
 _atom_site_aniso_U_11 
 _atom_site_aniso_U_22 
 _atom_site_aniso_U_33 
 _atom_site_aniso_U_23 
 _atom_site_aniso_U_13 
 _atom_site_aniso_U_12 
W1 0.0293(12) 0.0473(14) 0.0444(14) 0.000 0.0085(10) 0.000 
W2 0.0349(9) 0.0435(10) 0.0486(10) -0.0051(8) 0.0131(7) -0.0004(7) 
S1 0.037(7) 0.048(8) 0.057(9) 0.000 0.019(7) 0.000 
S2 0.060(9) 0.070(10) 0.051(9) 0.000 0.015(8) 0.000 
S3 0.052(6) 0.054(7) 0.067(7) -0.018(5) 0.018(6) -0.019(5) 
 
_geom_special_details 
; 
 All esds (except the esd in the dihedral angle between two l.s. planes) 
 are estimated using the full covariance matrix.  The cell esds are taken 
 into account individually in the estimation of esds in distances, angles 
 and torsion angles; correlations between esds in cell parameters are only 
 used when they are defined by crystal symmetry.  An approximate (isotropic) 
 treatment of cell esds is used for estimating esds involving l.s. planes. 
; 
 
loop_ 
 _geom_bond_atom_site_label_1 
 _geom_bond_atom_site_label_2 
 _geom_bond_distance 
 _geom_bond_site_symmetry_2 
 _geom_bond_publ_flag 
W1 N1 2.22(5) . ? 
W1 S2 2.446(14) . ? 
W1 S1 2.459(13) . ? 
W1 S3 2.461(10) 2_356 ? 
W1 S3 2.461(10) 5_366 ? 
W1 W2 2.655(2) 2_356 ? 
W1 W2 2.655(2) 5_366 ? 
W1 W2 2.659(2) . ? 
W1 W2 2.659(2) 6_565 ? 
W2 N2 2.29(4) . ? 
W2 S3 2.430(10) 2_356 ? 
W2 S3 2.447(9) . ? 
W2 S1 2.463(10) . ? 
W2 S2 2.474(12) 5_366 ? 
W2 W2 2.648(3) 2_356 ? 
W2 W2 2.651(3) 6_565 ? 
W2 W1 2.655(2) 5_366 ? 
S1 W2 2.463(10) 6_565 ? 
S2 W2 2.474(12) 2_356 ? 
S2 W2 2.474(12) 5_366 ? 
S3 W2 2.430(10) 2_356 ? 
S3 W1 2.461(10) 5_366 ? 
N1 C1 1.50(2) . ? 
N2 C5 1.51(2) . ? 
C1 C2 1.53(3) . ? 
C2 C3 1.51(3) . ? 
C3 C4 1.51(3) . ? 
C5 C6 1.52(3) . ? 
C6 C7 1.51(3) . ? 
C7 C8 1.53(3) . ? 
 
loop_ 
 _geom_angle_atom_site_label_1 
 _geom_angle_atom_site_label_2 
 _geom_angle_atom_site_label_3 
 _geom_angle 
 _geom_angle_site_symmetry_1 
 _geom_angle_site_symmetry_3 
 _geom_angle_publ_flag 
N1 W1 S2 95.6(13) . . ? 
N1 W1 S1 90.5(13) . . ? 
S2 W1 S1 173.9(4) . . ? 
N1 W1 S3 94.1(2) . 2_356 ? 
S2 W1 S3 90.3(2) . 2_356 ? 
S1 W1 S3 89.3(2) . 2_356 ? 
N1 W1 S3 94.1(2) . 5_366 ? 
S2 W1 S3 90.3(2) . 5_366 ? 
S1 W1 S3 89.3(2) . 5_366 ? 
S3 W1 S3 171.8(5) 2_356 5_366 ? 
N1 W1 W2 137.1(8) . 2_356 ? 
S2 W1 W2 57.9(3) . 2_356 ? 
S1 W1 W2 117.1(3) . 2_356 ? 
S3 W1 W2 57.0(2) 2_356 2_356 ? 
S3 W1 W2 116.8(2) 5_366 2_356 ? 
N1 W1 W2 137.1(8) . 5_366 ? 
S2 W1 W2 57.9(3) . 5_366 ? 
S1 W1 W2 117.1(3) . 5_366 ? 
S3 W1 W2 116.8(2) 2_356 5_366 ? 
S3 W1 W2 57.0(2) 5_366 5_366 ? 
W2 W1 W2 59.91(7) 2_356 5_366 ? 
N1 W1 W2 133.2(9) . . ? 
S2 W1 W2 117.6(3) . . ? 
S1 W1 W2 57.4(2) . . ? 
S3 W1 W2 56.5(2) 2_356 . ? 
S3 W1 W2 116.3(2) 5_366 . ? 
W2 W1 W2 59.80(7) 2_356 . ? 
W2 W1 W2 89.70(7) 5_366 . ? 
N1 W1 W2 133.2(9) . 6_565 ? 
S2 W1 W2 117.6(3) . 6_565 ? 
S1 W1 W2 57.4(2) . 6_565 ? 
S3 W1 W2 116.3(2) 2_356 6_565 ? 
S3 W1 W2 56.5(2) 5_366 6_565 ? 
W2 W1 W2 89.70(7) 2_356 6_565 ? 
W2 W1 W2 59.80(7) 5_366 6_565 ? 
W2 W1 W2 59.81(7) . 6_565 ? 
N2 W2 S3 95.1(9) . 2_356 ? 
N2 W2 S3 92.3(10) . . ? 
S3 W2 S3 88.9(4) 2_356 . ? 
N2 W2 S1 94.5(9) . . ? 
S3 W2 S1 89.9(4) 2_356 . ? 
S3 W2 S1 173.2(3) . . ? 
N2 W2 S2 91.2(9) . 5_366 ? 
S3 W2 S2 173.6(3) 2_356 5_366 ? 
S3 W2 S2 89.9(4) . 5_366 ? 
S1 W2 S2 90.5(4) . 5_366 ? 
N2 W2 W2 135.6(9) . 2_356 ? 
S3 W2 W2 57.4(2) 2_356 2_356 ? 
S3 W2 W2 56.8(2) . 2_356 ? 
S1 W2 W2 117.2(3) . 2_356 ? 
S2 W2 W2 117.0(3) 5_366 2_356 ? 
N2 W2 W2 134.3(9) . 6_565 ? 
S3 W2 W2 117.7(3) 2_356 6_565 ? 
S3 W2 W2 117.5(2) . 6_565 ? 
S1 W2 W2 57.44(15) . 6_565 ? 
S2 W2 W2 57.6(2) 5_366 6_565 ? 
W2 W2 W2 90.0 2_356 6_565 ? 
N2 W2 W1 132.5(9) . 5_366 ? 
S3 W2 W1 117.6(2) 2_356 5_366 ? 
S3 W2 W1 57.5(2) . 5_366 ? 
S1 W2 W1 117.5(2) . 5_366 ? 
S2 W2 W1 56.8(3) 5_366 5_366 ? 
W2 W2 W1 60.18(6) 2_356 5_366 ? 
W2 W2 W1 60.04(4) 6_565 5_366 ? 
N2 W2 W1 137.2(9) . . ? 
S3 W2 W1 57.6(3) 2_356 . ? 
S3 W2 W1 116.8(2) . . ? 
S1 W2 W1 57.2(3) . . ? 
S2 W2 W1 117.6(2) 5_366 . ? 
W2 W2 W1 60.03(6) 2_356 . ? 
W2 W2 W1 60.09(4) 6_565 . ? 
W1 W2 W1 90.30(7) 5_366 . ? 
W1 S1 W2 65.4(3) . . ? 
W1 S1 W2 65.4(3) . 6_565 ? 
W2 S1 W2 65.1(3) . 6_565 ? 
W1 S2 W2 65.3(3) . 2_356 ? 
W1 S2 W2 65.3(3) . 5_366 ? 
W2 S2 W2 64.8(4) 2_356 5_366 ? 
W2 S3 W2 65.8(2) 2_356 . ? 
W2 S3 W1 65.8(2) 2_356 5_366 ? 
W2 S3 W1 65.5(2) . 5_366 ? 
C1 N1 W1 120.0(37) . . ? 
C5 N2 W2 128.7(40) . . ? 
N1 C1 C2 112.1(50) . . ? 
C3 C2 C1 124.3(61) . . ? 
C2 C3 C4 129.5(80) . . ? 
N2 C5 C6 130.8(61) . . ? 
C7 C6 C5 113.6(59) . . ? 
C6 C7 C8 96.0(48) . . ? 
 
_refine_diff_density_max    2.541 
_refine_diff_density_min   -2.826 
_refine_diff_density_rms    0.604 


#===END
 
data_pcy4 
 
_audit_creation_method            SHELXL 
_chemical_name_systematic 
; 
octakis(\m~3~-sulfido)-hexakis(tricyclohexylphosphine)-hexa-tungsten
bis(heptane) solvate 
; 
_chemical_name_common             'Tungsten Sulfide cluster'  
_chemical_formula_moiety          'W6 S8 ((C6H11)3P)6'
_chemical_formula_structural      ? 
_chemical_formula_analytical      ? 
_chemical_formula_sum             'C122 H230 P6 S8 W6' 
_chemical_formula_weight          3242.46 
_chemical_melting_point           'not measured' 
_chemical_compound_source         ? 
 
loop_ 
 _atom_type_symbol 
 _atom_type_description 
 _atom_type_scat_dispersion_real 
 _atom_type_scat_dispersion_imag 
 _atom_type_scat_source 
 'C'  'C'   0.0033   0.0016 
 'International Tables Vol C Tables 4.2.6.8 and 6.1.1.4' 
 'H'  'H'   0.0000   0.0000 
 'International Tables Vol C Tables 4.2.6.8 and 6.1.1.4' 
 'P'  'P'   0.1023   0.0942 
 'International Tables Vol C Tables 4.2.6.8 and 6.1.1.4' 
 'S'  'S'   0.1246   0.1234 
 'International Tables Vol C Tables 4.2.6.8 and 6.1.1.4' 
 'W'  'W'  -0.8490   6.8722 
 'International Tables Vol C Tables 4.2.6.8 and 6.1.1.4' 
 
_symmetry_cell_setting            triclinic 
_symmetry_space_group_name_H-M    P-1 
 
loop_ 
 _symmetry_equiv_pos_as_xyz 
 'x, y, z' 
 '-x, -y, -z' 
 
_cell_length_a                    15.07290(10) 
_cell_length_b                    15.25580(10) 
_cell_length_c                    16.0623(2) 
_cell_angle_alpha                 62.1610(10) 
_cell_angle_beta                  78.8130(10) 
_cell_angle_gamma                 73.48 
_cell_volume                      3123.06(5) 
_cell_formula_units_Z             1 
_cell_measurement_temperature     165(2) 
_cell_measurement_reflns_used     ? 
_cell_measurement_theta_min       ? 
_cell_measurement_theta_max       ? 
 
_exptl_crystal_description        BLOCKS 
_exptl_crystal_colour             DARK-RED
_exptl_crystal_size_max           0.2 
_exptl_crystal_size_mid           0.1 
_exptl_crystal_size_min           0.1 
_exptl_crystal_density_meas       'not measured' 
_exptl_crystal_density_diffrn     1.724 
_exptl_crystal_density_method     'not measured' 
_exptl_crystal_F_000              1624 
_exptl_absorpt_coefficient_mu     5.759 
_exptl_absorpt_correction_type    psi-scan 
_exptl_absorpt_correction_T_min   0.3364 
_exptl_absorpt_correction_T_max   0.6943 
 
_exptl_special_details 
; 
SADABS
; 
 
_diffrn_ambient_temperature       165(2) 
_diffrn_radiation_wavelength      0.71073 
_diffrn_radiation_type            MoK\a 
_diffrn_radiation_source          'fine-focus sealed tube' 
_diffrn_radiation_monochromator   graphite 
_diffrn_measurement_device        'Siemens SMART CCD Diffractometer' 
_diffrn_measurement_method        '\w scans' 
_diffrn_standards_number          ? 
_diffrn_standards_interval_count  ? 
_diffrn_standards_interval_time   ? 
_diffrn_standards_decay_%         0 
_diffrn_reflns_number             18568 
_diffrn_reflns_av_R_equivalents   0.0614 
_diffrn_reflns_av_sigmaI/netI     0.1186 
_diffrn_reflns_limit_h_min        -18 
_diffrn_reflns_limit_h_max        19 
_diffrn_reflns_limit_k_min        -19 
_diffrn_reflns_limit_k_max        19 
_diffrn_reflns_limit_l_min        -8 
_diffrn_reflns_limit_l_max        20 
_diffrn_reflns_theta_min          1.41 
_diffrn_reflns_theta_max          28.31 
_reflns_number_total              12857 
_reflns_number_observed           9605 
_reflns_observed_criterion        >2sigma(I) 
 
_computing_data_collection        'BRUKER SMART' 
_computing_cell_refinement        'BRUKER SAINT' 
_computing_data_reduction         SHELXTL 
_computing_structure_solution     'SHELXS-86 (Sheldrick, 1990)' 
_computing_structure_refinement   'SHELXL-93 (Sheldrick, 1993)' 
_computing_molecular_graphics     SHELXTL 
_computing_publication_material   SHELXTL 
 
_refine_special_details 
; 
 Refinement on F^2^ for ALL reflections except for 3 with very negative F^2^ 
 or flagged by the user for potential systematic errors.  Weighted R-factors 
 wR and all goodnesses of fit S are based on F^2^, conventional R-factors R 
 are based on F, with F set to zero for negative F^2^. The observed criterion 
 of F^2^ > 2sigma(F^2^) is used only for calculating _R_factor_obs etc. and is 
 not relevant to the choice of reflections for refinement.  R-factors based 
 on F^2^ are statistically about twice as large as those based on F, and R- 
 factors based on ALL data will be even larger. 
; 
 
_refine_ls_structure_factor_coef  Fsqd  
_refine_ls_matrix_type            full 
_refine_ls_weighting_scheme 
 'calc w=1/[\s^2^(Fo^2^)+(0.0450P)^2^+0.0000P] where P=(Fo^2^+2Fc^2^)/3' 
_atom_sites_solution_primary      direct 
_atom_sites_solution_secondary    difmap 
_atom_sites_solution_hydrogens    geom 
_refine_ls_hydrogen_treatment     mixed 
_refine_ls_extinction_method      none 
_refine_ls_extinction_coef        ? 
_refine_ls_number_reflns          12854 
_refine_ls_number_parameters      605 
_refine_ls_number_restraints      11 
_refine_ls_R_factor_all           0.0752 
_refine_ls_R_factor_obs           0.0460 
_refine_ls_wR_factor_all          0.1443 
_refine_ls_wR_factor_obs          0.1201 
_refine_ls_goodness_of_fit_all    0.946 
_refine_ls_goodness_of_fit_obs    0.976 
_refine_ls_restrained_S_all       1.010 
_refine_ls_restrained_S_obs       0.978 
_refine_ls_shift/esd_max          0.742 
_refine_ls_shift/esd_mean         0.018 
 
loop_ 
 _atom_site_label 
 _atom_site_type_symbol 
 _atom_site_fract_x 
 _atom_site_fract_y 
 _atom_site_fract_z 
 _atom_site_U_iso_or_equiv 
 _atom_site_thermal_displace_type 
 _atom_site_occupancy 
 _atom_site_calc_flag 
 _atom_site_refinement_flags 
 _atom_site_disorder_group 
W1 W -0.00043(2) 0.48264(2) 0.39058(2) 0.01353(9) Uani 1 d . . 
W2 W -0.09587(2) 0.61893(2) 0.45484(2) 0.01342(9) Uani 1 d . . 
W3 W 0.09011(2) 0.57993(2) 0.43707(2) 0.01326(9) Uani 1 d . . 
S1 S -0.00608(14) 0.6659(2) 0.30211(15) 0.0180(4) Uani 1 d . . 
S2 S -0.16997(14) 0.5195(2) 0.41652(14) 0.0164(4) Uani 1 d . . 
S3 S 0.16883(14) 0.4481(2) 0.38415(15) 0.0183(4) Uani 1 d . . 
S4 S 0.00489(14) 0.30363(15) 0.49865(15) 0.0161(4) Uani 1 d . . 
P1 P 0.0014(2) 0.4544(2) 0.2423(2) 0.0237(5) Uani 1 d . . 
P2 P -0.2253(2) 0.7832(2) 0.3923(2) 0.0237(5) Uani 1 d . . 
P3 P 0.2142(2) 0.6899(2) 0.3526(2) 0.0220(5) Uani 1 d . . 
C101 C -0.1162(7) 0.4628(8) 0.2166(6) 0.034(2) Uani 1 d . . 
H10A H -0.1539(7) 0.5296(8) 0.2136(6) 0.040 Uiso 1 calc R . 
C102 C -0.1664(6) 0.3822(8) 0.2962(7) 0.035(3) Uani 1 d . . 
H10B H -0.1396(6) 0.3149(8) 0.2962(7) 0.042 Uiso 1 calc R . 
H10C H -0.1581(6) 0.3765(8) 0.3583(7) 0.042 Uiso 1 calc R . 
C103 C -0.2707(7) 0.4148(10) 0.2793(8) 0.048(3) Uani 1 d . . 
H10D H -0.3020(7) 0.3610(10) 0.3272(8) 0.058 Uiso 1 calc R . 
H10E H -0.2983(7) 0.4776(10) 0.2878(8) 0.058 Uiso 1 calc R . 
C104 C -0.2879(8) 0.4339(10) 0.1835(8) 0.048(3) Uani 1 d . . 
H10F H -0.2755(8) 0.3676(10) 0.1813(8) 0.058 Uiso 1 calc R . 
H10G H -0.3544(8) 0.4662(10) 0.1732(8) 0.058 Uiso 1 calc R . 
C105 C -0.2315(7) 0.4992(9) 0.1050(7) 0.041(3) Uani 1 d . . 
H10H H -0.2543(7) 0.5702(9) 0.0966(7) 0.049 Uiso 1 calc R . 
H10I H -0.2390(7) 0.4978(9) 0.0458(7) 0.049 Uiso 1 calc R . 
C106 C -0.1288(7) 0.4643(9) 0.1234(7) 0.038(3) Uani 1 d . . 
H10J H -0.0937(7) 0.5111(9) 0.0710(7) 0.046 Uiso 1 calc R . 
H10K H -0.1042(7) 0.3954(9) 0.1267(7) 0.046 Uiso 1 calc R . 
C107 C 0.0815(7) 0.3354(7) 0.2410(7) 0.032(2) Uani 1 d . . 
H10L H 0.1384(7) 0.3258(7) 0.2704(7) 0.039 Uiso 1 calc R . 
C108 C 0.1148(8) 0.3409(8) 0.1433(7) 0.040(3) Uani 1 d . . 
H10M H 0.1479(8) 0.3969(8) 0.1077(7) 0.048 Uiso 1 calc R . 
H10N H 0.0604(8) 0.3566(8) 0.1086(7) 0.048 Uiso 1 calc R . 
C109 C 0.1813(8) 0.2385(9) 0.1481(8) 0.049(3) Uani 1 d . . 
H10O H 0.1896(8) 0.2401(9) 0.0848(8) 0.059 Uiso 1 calc R . 
H10P H 0.2429(8) 0.2332(9) 0.1654(8) 0.059 Uiso 1 calc R . 
C110 C 0.1467(9) 0.1487(8) 0.2162(9) 0.054(3) Uani 1 d . . 
H11A H 0.0946(9) 0.1455(8) 0.1892(9) 0.065 Uiso 1 calc R . 
H11B H 0.1967(9) 0.0879(8) 0.2229(9) 0.065 Uiso 1 calc R . 
C111 C 0.1149(8) 0.1417(8) 0.3101(8) 0.049(3) Uani 1 d . . 
H11C H 0.1685(8) 0.1307(8) 0.3437(8) 0.059 Uiso 1 calc R . 
H11D H 0.0852(8) 0.0831(8) 0.3466(8) 0.059 Uiso 1 calc R . 
C112 C 0.0433(8) 0.2424(7) 0.3028(8) 0.039(3) Uani 1 d . . 
H11E H -0.0137(8) 0.2481(7) 0.2770(8) 0.046 Uiso 1 calc R . 
H11F H 0.0262(8) 0.2389(7) 0.3668(8) 0.046 Uiso 1 calc R . 
C113 C 0.0391(7) 0.5571(7) 0.1278(7) 0.033(2) Uani 1 d . . 
H11G H 0.0471(7) 0.5330(7) 0.0781(7) 0.039 Uiso 1 calc R . 
C114 C -0.0324(8) 0.6565(7) 0.0965(7) 0.039(3) Uani 1 d . . 
H11H H -0.0476(8) 0.6789(7) 0.1474(7) 0.047 Uiso 1 calc R . 
H11I H -0.0900(8) 0.6466(7) 0.0844(7) 0.047 Uiso 1 calc R . 
C115 C 0.0038(10) 0.7384(9) 0.0068(8) 0.060(4) Uani 1 d . . 
H11J H 0.0141(10) 0.7187(9) -0.0455(8) 0.072 Uiso 1 calc R . 
H11K H -0.0427(10) 0.8037(9) -0.0112(8) 0.072 Uiso 1 calc R . 
C116 C 0.0949(12) 0.7514(11) 0.0234(10) 0.082(5) Uani 1 d . . 
H11L H 0.0848(12) 0.7705(11) 0.0761(10) 0.099 Uiso 1 calc R . 
H11M H 0.1168(12) 0.8065(11) -0.0340(10) 0.099 Uiso 1 calc R . 
C117 C 0.1677(9) 0.6521(11) 0.0468(9) 0.057(4) Uani 1 d . . 
H11N H 0.1782(9) 0.6332(11) -0.0060(9) 0.068 Uiso 1 calc R . 
H11O H 0.2272(9) 0.6605(11) 0.0564(9) 0.068 Uiso 1 calc R . 
C118 C 0.1343(7) 0.5698(9) 0.1353(8) 0.039(3) Uani 1 d . . 
H11P H 0.1304(7) 0.5862(9) 0.1889(8) 0.047 Uiso 1 calc R . 
H11Q H 0.1801(7) 0.5046(9) 0.1487(8) 0.047 Uiso 1 calc R . 
C201 C -0.3024(6) 0.7936(7) 0.3075(7) 0.033(2) Uani 1 d . . 
H20A H -0.3423(6) 0.8641(7) 0.2818(7) 0.040 Uiso 1 calc R . 
C202 C -0.3663(6) 0.7180(7) 0.3517(7) 0.031(2) Uani 1 d . . 
H20B H -0.3287(6) 0.6474(7) 0.3764(7) 0.037 Uiso 1 calc R . 
H20C H -0.4065(6) 0.7277(7) 0.4046(7) 0.037 Uiso 1 calc R . 
C203 C -0.4258(8) 0.7370(9) 0.2753(8) 0.043(3) Uani 1 d . . 
H20D H -0.4657(8) 0.6871(9) 0.3026(8) 0.051 Uiso 1 calc R . 
H20E H -0.4669(8) 0.8058(9) 0.2556(8) 0.051 Uiso 1 calc R . 
C204 C -0.3709(8) 0.7293(9) 0.1909(8) 0.049(3) Uani 1 d . . 
H20F H -0.4135(8) 0.7481(9) 0.1426(8) 0.058 Uiso 1 calc R . 
H20G H -0.3368(8) 0.6579(9) 0.2085(8) 0.058 Uiso 1 calc R . 
C205 C -0.3026(8) 0.7972(9) 0.1495(8) 0.046(3) Uani 1 d . . 
H20H H -0.2638(8) 0.7854(9) 0.0968(8) 0.055 Uiso 1 calc R . 
H20I H -0.3365(8) 0.8693(9) 0.1240(8) 0.055 Uiso 1 calc R . 
C206 C -0.2429(7) 0.7760(8) 0.2224(7) 0.038(3) Uani 1 d . . 
H20J H -0.1984(7) 0.8210(8) 0.1943(7) 0.045 Uiso 1 calc R . 
H20K H -0.2069(7) 0.7047(8) 0.2456(7) 0.045 Uiso 1 calc R . 
C207 C -0.1851(7) 0.9063(8) 0.3213(7) 0.036(3) Uani 1 d . . 
H20L H -0.1304(7) 0.8910(8) 0.2798(7) 0.043 Uiso 1 calc R . 
C208 C -0.2521(8) 0.9967(8) 0.2548(9) 0.052(3) Uani 1 d . . 
H20M H -0.2748(8) 0.9760(8) 0.2143(9) 0.062 Uiso 1 calc R . 
H20N H -0.3063(8) 1.0185(8) 0.2922(9) 0.062 Uiso 1 calc R . 
C209 C -0.2073(10) 1.0839(9) 0.1940(10) 0.067(4) Uani 1 d . . 
H20O H -0.2536(10) 1.1419(9) 0.1535(10) 0.080 Uiso 1 calc R . 
H20P H -0.1569(10) 1.0641(9) 0.1521(10) 0.080 Uiso 1 calc R . 
C210 C -0.1676(11) 1.1171(9) 0.2515(9) 0.062(4) Uani 1 d . . 
H21A H -0.1354(11) 1.1725(9) 0.2088(9) 0.074 Uiso 1 calc R . 
H21B H -0.2183(11) 1.1433(9) 0.2890(9) 0.074 Uiso 1 calc R . 
C211 C -0.1008(9) 1.0288(9) 0.3158(9) 0.055(3) Uani 1 d . . 
H21C H -0.0759(9) 1.0500(9) 0.3545(9) 0.066 Uiso 1 calc R . 
H21D H -0.0481(9) 1.0055(9) 0.2779(9) 0.066 Uiso 1 calc R . 
C212 C -0.1489(8) 0.9413(8) 0.3804(8) 0.044(3) Uani 1 d . . 
H21E H -0.1044(8) 0.8839(8) 0.4238(8) 0.053 Uiso 1 calc R . 
H21F H -0.2011(8) 0.9642(8) 0.4189(8) 0.053 Uiso 1 calc R . 
C213 C -0.3115(6) 0.7964(7) 0.4892(7) 0.028(2) Uani 1 d . . 
H21G H -0.3338(6) 0.7317(7) 0.5208(7) 0.033 Uiso 1 calc R . 
C214 C -0.2694(7) 0.7991(8) 0.5677(7) 0.031(2) Uani 1 d . . 
H21H H -0.2120(7) 0.7452(8) 0.5860(7) 0.038 Uiso 1 calc R . 
H21I H -0.2533(7) 0.8656(8) 0.5446(7) 0.038 Uiso 1 calc R . 
C215 C -0.3386(7) 0.7828(9) 0.6518(8) 0.044(3) Uani 1 d . . 
H21J H -0.3491(7) 0.7132(9) 0.6783(8) 0.053 Uiso 1 calc R . 
H21K H -0.3125(7) 0.7879(9) 0.7009(8) 0.053 Uiso 1 calc R . 
C216 C -0.4296(7) 0.8574(8) 0.6287(8) 0.040(3) Uani 1 d . . 
H21L H -0.4213(7) 0.9257(8) 0.6130(8) 0.048 Uiso 1 calc R . 
H21M H -0.4741(7) 0.8380(8) 0.6848(8) 0.048 Uiso 1 calc R . 
C217 C -0.4689(7) 0.8623(8) 0.5475(7) 0.036(2) Uani 1 d . . 
H21N H -0.5252(7) 0.9181(8) 0.5300(7) 0.043 Uiso 1 calc R . 
H21O H -0.4874(7) 0.7978(8) 0.5669(7) 0.043 Uiso 1 calc R . 
C218 C -0.3995(6) 0.8801(7) 0.4624(7) 0.031(2) Uani 1 d . . 
H21P H -0.3844(6) 0.9471(7) 0.4395(7) 0.037 Uiso 1 calc R . 
H21Q H -0.4267(6) 0.8804(7) 0.4108(7) 0.037 Uiso 1 calc R . 
C301 C 0.1869(6) 0.7930(7) 0.2315(6) 0.025(2) Uani 1 d . . 
H30A H 0.1760(6) 0.7572(7) 0.1971(6) 0.030 Uiso 1 calc R . 
C302 C 0.2639(7) 0.8474(8) 0.1709(8) 0.039(3) Uani 1 d . . 
H30B H 0.2728(7) 0.8928(8) 0.1954(8) 0.047 Uiso 1 calc R . 
H30C H 0.3229(7) 0.7967(8) 0.1743(8) 0.047 Uiso 1 calc R . 
C303 C 0.2390(9) 0.9096(9) 0.0688(8) 0.050(3) Uani 1 d . . 
H30D H 0.2347(9) 0.8635(9) 0.0429(8) 0.060 Uiso 1 calc R . 
H30E H 0.2884(9) 0.9461(9) 0.0307(8) 0.060 Uiso 1 calc R . 
C304 C 0.1462(8) 0.9864(9) 0.0620(9) 0.055(3) Uani 1 d . . 
H30F H 0.1542(8) 1.0392(9) 0.0776(9) 0.065 Uiso 1 calc R . 
H30G H 0.1282(8) 1.0204(9) -0.0038(9) 0.065 Uiso 1 calc R . 
C305 C 0.0711(8) 0.9392(9) 0.1256(8) 0.052(3) Uani 1 d . . 
H30H H 0.0534(8) 0.8983(9) 0.1012(8) 0.062 Uiso 1 calc R . 
H30I H 0.0161(8) 0.9935(9) 0.1254(8) 0.062 Uiso 1 calc R . 
C306 C 0.0979(7) 0.8712(8) 0.2268(8) 0.043(3) Uani 1 d . . 
H30J H 0.1052(7) 0.9138(8) 0.2552(8) 0.051 Uiso 1 calc R . 
H30K H 0.0474(7) 0.8362(8) 0.2642(8) 0.051 Uiso 1 calc R . 
C307 C 0.2432(7) 0.7450(7) 0.4219(7) 0.029(2) Uani 1 d . . 
H30L H 0.2442(7) 0.6909(7) 0.4884(7) 0.035 Uiso 1 calc R . 
C308 C 0.1720(8) 0.8385(8) 0.4253(8) 0.046(3) Uani 1 d . . 
H30M H 0.1720(8) 0.8971(8) 0.3622(8) 0.055 Uiso 1 calc R . 
H30N H 0.1092(8) 0.8242(8) 0.4416(8) 0.055 Uiso 1 calc R . 
C309 C 0.1936(9) 0.8653(10) 0.4962(9) 0.057(4) Uani 1 d . . 
H30O H 0.1941(9) 0.8067(10) 0.5593(9) 0.068 Uiso 1 calc R . 
H30P H 0.1447(9) 0.9232(10) 0.4992(9) 0.068 Uiso 1 calc R . 
C310 C 0.2871(8) 0.8939(9) 0.4706(9) 0.052(3) Uani 1 d . . 
H31A H 0.2859(8) 0.9552(9) 0.4093(9) 0.063 Uiso 1 calc R . 
H31B H 0.3013(8) 0.9093(9) 0.5193(9) 0.063 Uiso 1 calc R . 
C311 C 0.3577(9) 0.8092(10) 0.4642(10) 0.060(4) Uani 1 d . . 
H31C H 0.3640(9) 0.7518(10) 0.5281(10) 0.072 Uiso 1 calc R . 
H31D H 0.4178(9) 0.8298(10) 0.4426(10) 0.072 Uiso 1 calc R . 
C312 C 0.3382(7) 0.7725(9) 0.3986(8) 0.039(3) Uani 1 d . . 
H31E H 0.3871(7) 0.7120(9) 0.4022(8) 0.047 Uiso 1 calc R . 
H31F H 0.3411(7) 0.8263(9) 0.3330(8) 0.047 Uiso 1 calc R . 
C313 C 0.3334(7) 0.6181(8) 0.3272(7) 0.033(2) Uani 1 d . . 
H31G H 0.3771(7) 0.6641(8) 0.3077(7) 0.039 Uiso 1 calc R . 
C314 C 0.3677(6) 0.5237(7) 0.4170(7) 0.032(2) Uani 1 d . . 
H31H H 0.3644(6) 0.5444(7) 0.4677(7) 0.038 Uiso 1 calc R . 
H31I H 0.3258(6) 0.4765(7) 0.4378(7) 0.038 Uiso 1 calc R . 
C315 C 0.4650(7) 0.4687(7) 0.4039(8) 0.035(2) Uani 1 d . . 
H31J H 0.4832(7) 0.4074(7) 0.4631(8) 0.041 Uiso 1 calc R . 
H31K H 0.5084(7) 0.5134(7) 0.3869(8) 0.041 Uiso 1 calc R . 
C316 C 0.4686(7) 0.4377(8) 0.3232(9) 0.046(3) Uani 1 d . . 
H31L H 0.5329(7) 0.4044(8) 0.3105(9) 0.055 Uiso 1 calc R . 
H31M H 0.4286(7) 0.3889(8) 0.3423(9) 0.055 Uiso 1 calc R . 
C317 C 0.4347(8) 0.5336(9) 0.2339(8) 0.049(3) Uani 1 d . . 
H31N H 0.4776(8) 0.5796(9) 0.2132(8) 0.059 Uiso 1 calc R . 
H31O H 0.4364(8) 0.5139(9) 0.1828(8) 0.059 Uiso 1 calc R . 
C318 C 0.3384(7) 0.5897(7) 0.2483(7) 0.031(2) Uani 1 d . . 
H31P H 0.2941(7) 0.5463(7) 0.2637(7) 0.037 Uiso 1 calc R . 
H31Q H 0.3210(7) 0.6518(7) 0.1894(7) 0.037 Uiso 1 calc R . 
C1S C -0.5766(28) 1.0176(33) 0.2079(27) 0.395(28) Uiso 1 d D . 
H1SA H -0.6281(28) 0.9843(33) 0.2420(27) 0.593 Uiso 1 calc R . 
H1SB H -0.5867(28) 1.0811(33) 0.2136(27) 0.593 Uiso 1 calc R . 
H1SC H -0.5183(28) 0.9725(33) 0.2349(27) 0.593 Uiso 1 calc R . 
C2S C -0.5718(22) 1.0406(25) 0.1067(26) 0.236(15) Uiso 1 d D . 
H2SA H -0.6298(22) 1.0869(25) 0.0778(26) 0.283 Uiso 1 calc R . 
H2SB H -0.5613(22) 0.9775(25) 0.0993(26) 0.283 Uiso 1 calc R . 
C3S C -0.4903(26) 1.0912(27) 0.0618(26) 0.336(24) Uiso 1 d D . 
H3SA H -0.4856(26) 1.1177(27) -0.0077(26) 0.404 Uiso 1 calc R . 
H3SB H -0.4312(26) 1.0435(27) 0.0867(26) 0.404 Uiso 1 calc R . 
C4S C -0.5149(21) 1.1781(25) 0.0915(23) 0.244(16) Uiso 1 d D . 
H4SA H -0.5829(21) 1.2053(25) 0.0920(23) 0.292 Uiso 1 calc R . 
H4SB H -0.4962(21) 1.1515(25) 0.1563(23) 0.292 Uiso 1 calc R . 
C5S C -0.4670(30) 1.2620(28) 0.0252(29) 0.392(29) Uiso 1 d D . 
H5SA H -0.4950(30) 1.2980(28) -0.0363(29) 0.470 Uiso 1 calc R . 
H5SB H -0.4007(30) 1.2327(28) 0.0145(29) 0.470 Uiso 1 calc R . 
C6S C -0.4754(28) 1.3400(30) 0.0664(30) 0.369(26) Uiso 1 d D . 
H6SA H -0.4589(28) 1.3019(30) 0.1329(30) 0.443 Uiso 1 calc R . 
H6SB H -0.4304(28) 1.3834(30) 0.0303(30) 0.443 Uiso 1 calc R . 
C7S C -0.5694(31) 1.4055(34) 0.0625(35) 0.407(31) Uiso 1 d D . 
H7SA H -0.5708(31) 1.4518(34) 0.0895(35) 0.611 Uiso 1 calc R . 
H7SB H -0.6143(31) 1.3631(34) 0.0987(35) 0.611 Uiso 1 calc R . 
H7SC H -0.5854(31) 1.4452(34) -0.0033(35) 0.611 Uiso 1 calc R . 
 
loop_ 
 _atom_site_aniso_label 
 _atom_site_aniso_U_11 
 _atom_site_aniso_U_22 
 _atom_site_aniso_U_33 
 _atom_site_aniso_U_23 
 _atom_site_aniso_U_13 
 _atom_site_aniso_U_12 
W1 0.0151(2) 0.0127(2) 0.0125(2) -0.00470(13) -0.00209(12) -0.00339(12) 
W2 0.0135(2) 0.0123(2) 0.0139(2) -0.00467(13) -0.00232(12) -0.00301(12) 
W3 0.0141(2) 0.0122(2) 0.0130(2) -0.00438(13) -0.00141(12) -0.00400(13) 
S1 0.0171(10) 0.0171(11) 0.0186(11) -0.0056(9) -0.0007(8) -0.0061(8) 
S2 0.0184(11) 0.0158(10) 0.0138(10) -0.0052(8) -0.0019(8) -0.0038(8) 
S3 0.0147(10) 0.0198(11) 0.0194(11) -0.0096(9) 0.0013(8) -0.0022(8) 
S4 0.0150(10) 0.0145(10) 0.0202(11) -0.0084(9) -0.0028(8) -0.0031(8) 
P1 0.0278(13) 0.0205(12) 0.0231(13) -0.0089(10) -0.0045(10) -0.0053(10) 
P2 0.0251(13) 0.0194(12) 0.0251(13) -0.0078(10) -0.0041(10) -0.0044(10) 
P3 0.0239(12) 0.0189(12) 0.0238(13) -0.0090(10) -0.0020(10) -0.0061(9) 
C101 0.027(5) 0.043(6) 0.019(5) -0.007(5) -0.002(4) -0.002(5) 
C102 0.026(5) 0.048(7) 0.027(6) -0.012(5) -0.001(4) -0.010(5) 
C103 0.026(6) 0.069(9) 0.053(8) -0.030(7) -0.001(5) -0.012(6) 
C104 0.039(7) 0.067(8) 0.049(8) -0.032(7) -0.007(5) -0.014(6) 
C105 0.043(7) 0.048(7) 0.031(6) -0.017(5) -0.010(5) -0.005(5) 
C106 0.038(6) 0.049(7) 0.034(6) -0.024(5) -0.005(5) -0.007(5) 
C107 0.038(6) 0.028(5) 0.030(6) -0.013(5) -0.008(4) -0.003(4) 
C108 0.054(7) 0.047(7) 0.030(6) -0.030(5) -0.001(5) -0.006(6) 
C109 0.058(8) 0.054(8) 0.045(7) -0.033(7) -0.008(6) -0.003(6) 
C110 0.083(10) 0.034(7) 0.061(9) -0.036(6) -0.014(7) -0.002(6) 
C111 0.060(8) 0.035(7) 0.051(8) -0.016(6) -0.022(6) -0.003(6) 
C112 0.055(7) 0.027(6) 0.039(7) -0.018(5) -0.011(5) -0.007(5) 
C113 0.047(6) 0.027(5) 0.027(6) -0.017(5) -0.003(5) -0.004(5) 
C114 0.057(7) 0.027(6) 0.032(6) -0.011(5) -0.015(5) -0.004(5) 
C115 0.113(12) 0.030(7) 0.039(7) -0.010(6) -0.020(7) -0.014(7) 
C116 0.132(15) 0.069(11) 0.046(9) -0.002(8) 0.001(9) -0.069(11) 
C117 0.059(8) 0.095(11) 0.048(8) -0.046(8) 0.017(6) -0.050(8) 
C118 0.035(6) 0.050(7) 0.040(7) -0.024(6) 0.000(5) -0.017(5) 
C201 0.021(5) 0.024(5) 0.041(6) -0.007(5) -0.004(4) 0.002(4) 
C202 0.026(5) 0.029(5) 0.036(6) -0.016(5) -0.001(4) -0.003(4) 
C203 0.042(7) 0.041(7) 0.050(7) -0.023(6) -0.012(5) -0.006(5) 
C204 0.051(7) 0.061(8) 0.046(7) -0.029(6) -0.012(6) -0.016(6) 
C205 0.052(7) 0.051(7) 0.032(6) -0.020(6) -0.018(5) 0.007(6) 
C206 0.047(7) 0.032(6) 0.033(6) -0.012(5) -0.003(5) -0.011(5) 
C207 0.032(6) 0.037(6) 0.037(6) -0.014(5) 0.004(5) -0.014(5) 
C208 0.051(8) 0.029(6) 0.064(9) -0.012(6) -0.012(6) -0.004(5) 
C209 0.077(10) 0.031(7) 0.075(10) -0.002(7) -0.015(8) -0.021(7) 
C210 0.111(12) 0.027(6) 0.042(8) -0.005(6) -0.005(7) -0.023(7) 
C211 0.065(9) 0.039(7) 0.073(10) -0.029(7) -0.007(7) -0.021(6) 
C212 0.046(7) 0.030(6) 0.057(8) -0.022(6) -0.012(6) 0.000(5) 
C213 0.018(5) 0.032(5) 0.032(6) -0.011(5) -0.003(4) -0.008(4) 
C214 0.031(6) 0.032(6) 0.032(6) -0.015(5) 0.000(4) -0.010(4) 
C215 0.047(7) 0.054(7) 0.039(7) -0.027(6) -0.002(5) -0.013(6) 
C216 0.042(7) 0.041(6) 0.039(7) -0.024(6) -0.003(5) -0.002(5) 
C217 0.036(6) 0.035(6) 0.039(6) -0.023(5) -0.001(5) -0.002(5) 
C218 0.027(5) 0.030(5) 0.033(6) -0.015(5) -0.009(4) 0.004(4) 
C301 0.025(5) 0.025(5) 0.028(5) -0.015(4) 0.003(4) -0.009(4) 
C302 0.041(6) 0.033(6) 0.045(7) -0.012(5) -0.003(5) -0.018(5) 
C303 0.070(9) 0.043(7) 0.028(6) -0.005(5) 0.005(6) -0.024(6) 
C304 0.063(8) 0.038(7) 0.047(8) -0.007(6) -0.011(6) -0.003(6) 
C305 0.063(8) 0.036(7) 0.050(8) -0.012(6) -0.033(6) 0.008(6) 
C306 0.043(7) 0.032(6) 0.043(7) -0.006(5) -0.016(5) -0.001(5) 
C307 0.034(6) 0.030(5) 0.028(5) -0.016(5) -0.006(4) -0.004(4) 
C308 0.048(7) 0.037(6) 0.048(7) -0.016(6) -0.003(6) -0.008(5) 
C309 0.072(9) 0.066(9) 0.051(8) -0.037(7) 0.005(7) -0.029(7) 
C310 0.052(8) 0.048(8) 0.062(9) -0.023(7) -0.022(6) -0.009(6) 
C311 0.052(8) 0.064(9) 0.087(11) -0.044(8) 0.001(7) -0.031(7) 
C312 0.040(6) 0.045(7) 0.044(7) -0.025(6) 0.005(5) -0.021(5) 
C313 0.028(5) 0.040(6) 0.022(5) -0.006(5) -0.001(4) -0.010(5) 
C314 0.032(6) 0.027(5) 0.039(6) -0.016(5) -0.002(5) -0.007(4) 
C315 0.030(5) 0.027(5) 0.044(7) -0.008(5) -0.009(5) -0.010(4) 
C316 0.018(5) 0.037(6) 0.071(9) -0.020(6) 0.001(5) 0.002(5) 
C317 0.041(7) 0.047(7) 0.047(7) -0.010(6) 0.006(5) -0.016(6) 
C318 0.038(6) 0.026(5) 0.033(6) -0.016(5) 0.009(4) -0.016(4) 
 
_geom_special_details 
; 
 All esds (except the esd in the dihedral angle between two l.s. planes) 
 are estimated using the full covariance matrix.  The cell esds are taken 
 into account individually in the estimation of esds in distances, angles 
 and torsion angles; correlations between esds in cell parameters are only 
 used when they are defined by crystal symmetry.  An approximate (isotropic) 
 treatment of cell esds is used for estimating esds involving l.s. planes. 
; 
 
loop_ 
 _geom_bond_atom_site_label_1 
 _geom_bond_atom_site_label_2 
 _geom_bond_distance 
 _geom_bond_site_symmetry_2 
 _geom_bond_publ_flag 
W1 S4 2.445(2) . ? 
W1 S3 2.446(2) . ? 
W1 S2 2.451(2) . ? 
W1 S1 2.458(2) . ? 
W1 P1 2.604(3) . ? 
W1 W2 2.6806(5) . ? 
W1 W2 2.6832(5) 2_566 ? 
W1 W3 2.6842(5) . ? 
W1 W3 2.6863(4) 2_566 ? 
W2 S4 2.445(2) 2_566 ? 
W2 S1 2.446(2) . ? 
W2 S3 2.451(2) 2_566 ? 
W2 S2 2.456(2) . ? 
W2 P2 2.593(2) . ? 
W2 W3 2.6821(4) . ? 
W2 W1 2.6832(5) 2_566 ? 
W2 W3 2.6861(4) 2_566 ? 
W3 S4 2.442(2) 2_566 ? 
W3 S1 2.450(2) . ? 
W3 S2 2.451(2) 2_566 ? 
W3 S3 2.455(2) . ? 
W3 P3 2.614(2) . ? 
W3 W2 2.6861(4) 2_566 ? 
W3 W1 2.6863(4) 2_566 ? 
S2 W3 2.451(2) 2_566 ? 
S3 W2 2.451(2) 2_566 ? 
S4 W3 2.442(2) 2_566 ? 
S4 W2 2.445(2) 2_566 ? 
P1 C101 1.853(10) . ? 
P1 C107 1.880(10) . ? 
P1 C113 1.890(10) . ? 
P2 C213 1.873(9) . ? 
P2 C201 1.882(11) . ? 
P2 C207 1.889(10) . ? 
P3 C307 1.845(10) . ? 
P3 C301 1.873(9) . ? 
P3 C313 1.900(10) . ? 
C101 C106 1.534(14) . ? 
C101 C102 1.550(13) . ? 
C102 C103 1.545(13) . ? 
C103 C104 1.489(15) . ? 
C104 C105 1.483(14) . ? 
C105 C106 1.525(14) . ? 
C107 C112 1.502(13) . ? 
C107 C108 1.523(13) . ? 
C108 C109 1.574(14) . ? 
C109 C110 1.46(2) . ? 
C110 C111 1.455(15) . ? 
C111 C112 1.574(14) . ? 
C113 C114 1.512(13) . ? 
C113 C118 1.534(14) . ? 
C114 C115 1.528(15) . ? 
C115 C116 1.53(2) . ? 
C116 C117 1.52(2) . ? 
C117 C118 1.505(15) . ? 
C201 C202 1.537(13) . ? 
C201 C206 1.574(14) . ? 
C202 C203 1.529(14) . ? 
C203 C204 1.481(14) . ? 
C204 C205 1.51(2) . ? 
C205 C206 1.475(14) . ? 
C207 C212 1.52(2) . ? 
C207 C208 1.522(14) . ? 
C208 C209 1.491(15) . ? 
C209 C210 1.51(2) . ? 
C210 C211 1.49(2) . ? 
C211 C212 1.533(15) . ? 
C213 C218 1.523(12) . ? 
C213 C214 1.539(13) . ? 
C214 C215 1.504(13) . ? 
C215 C216 1.493(14) . ? 
C216 C217 1.497(14) . ? 
C217 C218 1.516(13) . ? 
C301 C306 1.508(13) . ? 
C301 C302 1.529(12) . ? 
C302 C303 1.520(15) . ? 
C303 C304 1.533(15) . ? 
C304 C305 1.47(2) . ? 
C305 C306 1.524(14) . ? 
C307 C312 1.535(13) . ? 
C307 C308 1.539(13) . ? 
C308 C309 1.49(2) . ? 
C309 C310 1.52(2) . ? 
C310 C311 1.45(2) . ? 
C311 C312 1.51(2) . ? 
C313 C318 1.503(13) . ? 
C313 C314 1.533(13) . ? 
C314 C315 1.498(12) . ? 
C315 C316 1.56(2) . ? 
C316 C317 1.536(15) . ? 
C317 C318 1.497(13) . ? 
C1S C2S 1.49(3) . ? 
C2S C3S 1.52(2) . ? 
C3S C4S 1.54(2) . ? 
C4S C5S 1.50(3) . ? 
C5S C6S 1.58(3) . ? 
C6S C7S 1.48(3) . ? 
 
loop_ 
 _geom_angle_atom_site_label_1 
 _geom_angle_atom_site_label_2 
 _geom_angle_atom_site_label_3 
 _geom_angle 
 _geom_angle_site_symmetry_1 
 _geom_angle_site_symmetry_3 
 _geom_angle_publ_flag 
S4 W1 S3 89.67(7) . . ? 
S4 W1 S2 89.51(7) . . ? 
S3 W1 S2 172.27(7) . . ? 
S4 W1 S1 171.85(7) . . ? 
S3 W1 S1 89.91(7) . . ? 
S2 W1 S1 89.81(7) . . ? 
S4 W1 P1 92.95(7) . . ? 
S3 W1 P1 93.12(7) . . ? 
S2 W1 P1 94.60(7) . . ? 
S1 W1 P1 95.21(7) . . ? 
S4 W1 W2 116.61(5) . . ? 
S3 W1 W2 116.88(5) . . ? 
S2 W1 W2 56.97(5) . . ? 
S1 W1 W2 56.65(5) . . ? 
P1 W1 W2 136.33(5) . . ? 
S4 W1 W2 56.72(5) . 2_566 ? 
S3 W1 W2 56.88(5) . 2_566 ? 
S2 W1 W2 116.66(5) . 2_566 ? 
S1 W1 W2 116.70(5) . 2_566 ? 
P1 W1 W2 133.72(5) . 2_566 ? 
W2 W1 W2 89.949(14) . 2_566 ? 
S4 W1 W3 116.72(5) . . ? 
S3 W1 W3 56.95(5) . . ? 
S2 W1 W3 116.91(5) . . ? 
S1 W1 W3 56.70(5) . . ? 
P1 W1 W3 135.22(5) . . ? 
W2 W1 W3 59.992(12) . . ? 
W2 W1 W3 60.059(12) 2_566 . ? 
S4 W1 W3 56.60(5) . 2_566 ? 
S3 W1 W3 116.77(5) . 2_566 ? 
S2 W1 W3 56.77(5) . 2_566 ? 
S1 W1 W3 116.67(5) . 2_566 ? 
P1 W1 W3 134.65(5) . 2_566 ? 
W2 W1 W3 60.065(12) . 2_566 ? 
W2 W1 W3 59.935(12) 2_566 2_566 ? 
W3 W1 W3 90.094(14) . 2_566 ? 
S4 W2 S1 89.58(7) 2_566 . ? 
S4 W2 S3 89.55(7) 2_566 2_566 ? 
S1 W2 S3 172.36(7) . 2_566 ? 
S4 W2 S2 171.96(7) 2_566 . ? 
S1 W2 S2 89.98(7) . . ? 
S3 W2 S2 89.82(7) 2_566 . ? 
S4 W2 P2 93.36(7) 2_566 . ? 
S1 W2 P2 93.23(7) . . ? 
S3 W2 P2 94.40(7) 2_566 . ? 
S2 W2 P2 94.68(7) . . ? 
S4 W2 W1 116.68(5) 2_566 . ? 
S1 W2 W1 57.09(5) . . ? 
S3 W2 W1 116.88(5) 2_566 . ? 
S2 W2 W1 56.81(5) . . ? 
P2 W2 W1 135.12(6) . . ? 
S4 W2 W3 56.67(5) 2_566 . ? 
S1 W2 W3 56.86(5) . . ? 
S3 W2 W3 116.72(5) 2_566 . ? 
S2 W2 W3 116.83(5) . . ? 
P2 W2 W3 134.09(5) . . ? 
W1 W2 W3 60.071(12) . . ? 
S4 W2 W1 56.73(5) 2_566 2_566 ? 
S1 W2 W1 116.91(5) . 2_566 ? 
S3 W2 W1 56.67(5) 2_566 2_566 ? 
S2 W2 W1 116.67(5) . 2_566 ? 
P2 W2 W1 134.81(6) . 2_566 ? 
W1 W2 W1 90.051(14) . 2_566 ? 
W3 W2 W1 60.091(12) . 2_566 ? 
S4 W2 W3 116.67(5) 2_566 2_566 ? 
S1 W2 W3 117.11(5) . 2_566 ? 
S3 W2 W3 56.86(5) 2_566 2_566 ? 
S2 W2 W3 56.73(5) . 2_566 ? 
P2 W2 W3 135.77(5) . 2_566 ? 
W1 W2 W3 60.073(12) . 2_566 ? 
W3 W2 W3 90.145(13) . 2_566 ? 
W1 W2 W3 59.990(12) 2_566 2_566 ? 
S4 W3 S1 89.55(7) 2_566 . ? 
S4 W3 S2 89.58(7) 2_566 2_566 ? 
S1 W3 S2 172.16(7) . 2_566 ? 
S4 W3 S3 171.75(7) 2_566 . ? 
S1 W3 S3 89.90(7) . . ? 
S2 W3 S3 89.85(7) 2_566 . ? 
S4 W3 P3 93.60(7) 2_566 . ? 
S1 W3 P3 94.46(7) . . ? 
S2 W3 P3 93.36(7) 2_566 . ? 
S3 W3 P3 94.64(7) . . ? 
S4 W3 W2 56.76(5) 2_566 . ? 
S1 W3 W2 56.72(5) . . ? 
S2 W3 W2 116.70(5) 2_566 . ? 
S3 W3 W2 116.51(5) . . ? 
P3 W3 W2 135.10(5) . . ? 
S4 W3 W1 116.64(5) 2_566 . ? 
S1 W3 W1 57.00(5) . . ? 
S2 W3 W1 116.79(5) 2_566 . ? 
S3 W3 W1 56.63(5) . . ? 
P3 W3 W1 135.78(6) . . ? 
W2 W3 W1 59.937(12) . . ? 
S4 W3 W2 116.52(5) 2_566 2_566 ? 
S1 W3 W2 116.88(5) . 2_566 ? 
S2 W3 W2 56.90(5) 2_566 2_566 ? 
S3 W3 W2 56.75(5) . 2_566 ? 
P3 W3 W2 135.03(5) . 2_566 ? 
W2 W3 W2 89.855(13) . 2_566 ? 
W1 W3 W2 59.951(12) . 2_566 ? 
S4 W3 W1 56.72(5) 2_566 2_566 ? 
S1 W3 W1 116.65(5) . 2_566 ? 
S2 W3 W1 56.78(5) 2_566 2_566 ? 
S3 W3 W1 116.55(5) . 2_566 ? 
P3 W3 W1 134.32(6) . 2_566 ? 
W2 W3 W1 59.975(12) . 2_566 ? 
W1 W3 W1 89.906(14) . 2_566 ? 
W2 W3 W1 59.862(12) 2_566 2_566 ? 
W2 S1 W3 66.43(6) . . ? 
W2 S1 W1 66.26(5) . . ? 
W3 S1 W1 66.30(5) . . ? 
W3 S2 W1 66.45(5) 2_566 . ? 
W3 S2 W2 66.37(6) 2_566 . ? 
W1 S2 W2 66.22(5) . . ? 
W1 S3 W2 66.45(5) . 2_566 ? 
W1 S3 W3 66.43(5) . . ? 
W2 S3 W3 66.39(5) 2_566 . ? 
W3 S4 W2 66.57(5) 2_566 2_566 ? 
W3 S4 W1 66.68(5) 2_566 . ? 
W2 S4 W1 66.55(5) 2_566 . ? 
C101 P1 C107 109.2(5) . . ? 
C101 P1 C113 100.6(4) . . ? 
C107 P1 C113 102.4(4) . . ? 
C101 P1 W1 112.6(3) . . ? 
C107 P1 W1 116.3(3) . . ? 
C113 P1 W1 114.2(3) . . ? 
C213 P2 C201 101.8(4) . . ? 
C213 P2 C207 108.4(5) . . ? 
C201 P2 C207 100.1(5) . . ? 
C213 P2 W2 112.1(3) . . ? 
C201 P2 W2 116.7(3) . . ? 
C207 P2 W2 116.1(3) . . ? 
C307 P3 C301 109.0(4) . . ? 
C307 P3 C313 101.1(5) . . ? 
C301 P3 C313 101.1(4) . . ? 
C307 P3 W3 114.5(3) . . ? 
C301 P3 W3 114.5(3) . . ? 
C313 P3 W3 115.1(3) . . ? 
C106 C101 C102 106.9(9) . . ? 
C106 C101 P1 118.9(7) . . ? 
C102 C101 P1 114.3(7) . . ? 
C103 C102 C101 108.9(8) . . ? 
C104 C103 C102 112.8(9) . . ? 
C105 C104 C103 114.8(10) . . ? 
C104 C105 C106 112.0(9) . . ? 
C105 C106 C101 109.9(8) . . ? 
C112 C107 C108 111.3(9) . . ? 
C112 C107 P1 112.5(7) . . ? 
C108 C107 P1 115.2(7) . . ? 
C107 C108 C109 112.1(9) . . ? 
C110 C109 C108 113.1(10) . . ? 
C111 C110 C109 117.3(10) . . ? 
C110 C111 C112 110.0(9) . . ? 
C107 C112 C111 112.3(9) . . ? 
C114 C113 C118 112.3(9) . . ? 
C114 C113 P1 112.9(7) . . ? 
C118 C113 P1 110.0(7) . . ? 
C113 C114 C115 110.7(9) . . ? 
C116 C115 C114 110.0(10) . . ? 
C115 C116 C117 109.5(11) . . ? 
C118 C117 C116 109.1(10) . . ? 
C117 C118 C113 112.8(9) . . ? 
C202 C201 C206 107.3(8) . . ? 
C202 C201 P2 114.3(7) . . ? 
C206 C201 P2 110.7(6) . . ? 
C203 C202 C201 108.3(9) . . ? 
C204 C203 C202 113.6(9) . . ? 
C203 C204 C205 112.3(10) . . ? 
C206 C205 C204 110.2(10) . . ? 
C205 C206 C201 111.0(9) . . ? 
C212 C207 C208 108.1(9) . . ? 
C212 C207 P2 114.0(8) . . ? 
C208 C207 P2 117.4(8) . . ? 
C209 C208 C207 111.7(10) . . ? 
C208 C209 C210 112.1(12) . . ? 
C211 C210 C209 109.5(10) . . ? 
C210 C211 C212 110.4(11) . . ? 
C207 C212 C211 109.9(10) . . ? 
C218 C213 C214 108.7(8) . . ? 
C218 C213 P2 118.4(7) . . ? 
C214 C213 P2 114.4(6) . . ? 
C215 C214 C213 109.2(8) . . ? 
C216 C215 C214 113.2(9) . . ? 
C215 C216 C217 112.2(9) . . ? 
C216 C217 C218 111.7(9) . . ? 
C217 C218 C213 109.7(8) . . ? 
C306 C301 C302 109.0(8) . . ? 
C306 C301 P3 115.3(7) . . ? 
C302 C301 P3 117.3(7) . . ? 
C303 C302 C301 110.4(9) . . ? 
C302 C303 C304 110.6(10) . . ? 
C305 C304 C303 112.9(9) . . ? 
C304 C305 C306 113.1(10) . . ? 
C301 C306 C305 111.9(9) . . ? 
C312 C307 C308 106.0(9) . . ? 
C312 C307 P3 117.5(7) . . ? 
C308 C307 P3 116.1(7) . . ? 
C309 C308 C307 111.5(10) . . ? 
C308 C309 C310 111.0(10) . . ? 
C311 C310 C309 108.7(10) . . ? 
C310 C311 C312 114.5(11) . . ? 
C311 C312 C307 113.0(9) . . ? 
C318 C313 C314 110.4(9) . . ? 
C318 C313 P3 114.1(7) . . ? 
C314 C313 P3 110.5(6) . . ? 
C315 C314 C313 113.2(8) . . ? 
C314 C315 C316 108.0(8) . . ? 
C317 C316 C315 108.9(9) . . ? 
C318 C317 C316 113.0(9) . . ? 
C317 C318 C313 110.0(10) . . ? 
C1S C2S C3S 104.6(21) . . ? 
C2S C3S C4S 102.3(21) . . ? 
C5S C4S C3S 111.0(21) . . ? 
C4S C5S C6S 111.0(25) . . ? 
C7S C6S C5S 112.9(27) . . ? 
 
_refine_diff_density_max    2.612 
_refine_diff_density_min   -3.665 
_refine_diff_density_rms    0.336 


#Submission Details 

data_global 
_publ_contact_author 
; 
Prof. Francis J. DiSalvo 
Department of Chemistry and Chemical Biology 
Cornell University 
Ithaca, NY 14853 
; 
  
_publ_contact_email    fjd3@cornell.edu 
_publ_contact_author_fax   '607-255-4137' 
_publ_contact_author_phone  '607-255-7238' 
  
  
_publ_contact_letter 
; 
This is a CIF submission as the Supporting Information for the paper 
submitted for publication in Inorganic chemistry (Ms. IC991426L) 
; 
  
_publ_requested_journal      'Inorganic Chemistry' 
  
  
#  Title and Author List 
  
_publ_section_title 
; 
Ligand Substitution Reactions of W6S8L6 with Tricyclohexylphosphine
(L=4-tert-butylpyridine or n-butylamine): 31P NMR and Structural Studies of
 W6S8(PCy3)n(4-tert-butylpyridine)6-n(0<n<=6) Complexes. 
; 
  
loop_ 
_publ_author_name 
'Jin, Song'
'Venkataraman, D.' 
'DiSalvo, Francis J.' 
  
_publ_author_address 
; 
Department of Chemistry and Chemical Biology 
Cornell University 
Ithaca, NY 14853 
; 
  
#===END
